# Supplementary material for: A T follicular helper cell origin for T regulatory type 1 cells
Source: PubMed Central journal article supplement (PMC10202951; doi:10.1038/s41423-023-00989-z), 2023-03-27
Supplement: 41423_2023_989_MOESM1_ESM.pdf [file 41423_2023_989_MOESM1_ESM.pdf]

Supplementary Table 1. Differential expression (DE) of 106 TR1/TFH/Treg-relevant genes in the various T-cell pools studied here (bulk RNAseq)

| Gene type                | Genes (protein) | Described in TR1 (ref) | Described in other Treg types (ref) | Described in TFH (ref) | DE in Tet+ (vs. Tet-) | Expressed in Tet+ (norm. counts) | DE in TFH+ (vs. Tconv) | DE in Tet+ (vs. Tconv) | DE in Tet+ (vs. TFH) | DE in Tet+ (vs. Tet- /CXCR5+/PD-1+) BASAL |
|--------------------------|-----------------|------------------------|-------------------------------------|------------------------|-----------------------|----------------------------------|------------------------|------------------------|----------------------|-------------------------------------------|
| Cell adhesion molecules  | Cd226           | + (1)                  | ND                                  | ND                     | +                     | 65.23                            | --                     | ++                     | +++                  | +                                         |
|                          | Itga2 (CD49b)   | + (1)                  | ND                                  | ND                     | --                    | 1.38                             | ---                    | NS                     | ++                   | ---                                       |
|                          | Itgae (CD103)   | + (2)                  | + (3)                               | ND                     | -                     | 6.21                             | NS                     | +++                    | +++                  | NS                                        |
|                          | Ocln            | ND                     | ND                                  | ND                     | +++                   | 3.13                             | NS                     | +++                    | +++                  | +++                                       |
|                          | S1pr2           | ND                     | ND                                  | + (4)                  | +++                   | 100.76                           | +++                    | +++                    | -                    | +                                         |
|                          | Sell (CD62L)    | - (5)                  | + (6)                               | - (7)                  | ---                   | 101.52                           | ---                    | ---                    | +++                  | NS                                        |
|                          | Selpig (Psg1)   | ND                     | ND                                  | - (8)                  | --                    | 184.73                           | ---                    | --                     | +++                  | NS                                        |
| Chemokine receptors      | Ccr5            | + (9)                  | + (10)                              | + (11)                 | +++                   | 47.50                            | +++                    | +++                    | +++                  | ++                                        |
|                          | Ccr7            | ND                     | + (12)                              | - (13)                 | --                    | 174.10                           | ---                    | --                     | +++                  | NS                                        |
|                          | Cxcr3           | + (14)                 | + (12)                              | In some subsets (15)   | ++                    | 153.84                           | +++                    | +++                    | +++                  | NS                                        |
|                          | Cxcr4           | ND                     | ND                                  | + (16)                 | NS                    | 188.11                           | +++                    | ++                     | NS                   | NS                                        |
|                          | Cxcr5           | ND                     | ND                                  | + (17)                 | +++                   | 380.73                           | +++                    | +++                    | --                   | NS                                        |
| Co-stimulatory molecules | Cd28            | + (18)                 | ND                                  | + (19)                 | ++                    | 627.72                           | ++                     | ++                     | +                    | NS                                        |
|                          | Cd40lg          | ND                     | ND                                  | + (20)                 | +                     | 182.86                           | ++                     | ++                     | +                    | NS                                        |
|                          | Icos            | + (21)                 | + (22)                              | + (23)                 | ++                    | 337.09                           | +++                    | +++                    | -                    | NS                                        |
|                          | Klrk1 (NKG2D)   | ND                     | + (24)                              | ND                     | ---                   | 0.24                             | NS                     | NS                     | NS                   | NS                                        |
|                          | Sh2d1a (SAP)    | ND                     | ND                                  | + (25)                 | +                     | 78.17                            | +++                    | ++                     | --                   | -                                         |
|                          | Tnfrsf4 (Ox40)  | + (26)                 | + (27)                              | + (28)                 | ++                    | 150.36                           | +++                    | +++                    | ++                   | +                                         |
|                          | Tnfrsf18 (GITR) | + (18)                 | + (29)                              | ND                     | +                     | 128.13                           | +                      | ++                     | +                    | NS                                        |
| Tnfsf4 (Ox40L)           | ND              | ND                     | ND                                  | ++                     | 1.93                  | +++                              | +++                    | +++                    | NS                   |                                           |
| Co-inhibitory molecules  | Ctla4           | + (30)                 | + (31)                              | + (32)                 | +++                   | 663.75                           | +++                    | +++                    | ++                   | ++                                        |
|                          | Fasl            | ND                     | + (33)                              | ND                     | --                    | 4.58                             | --                     | NS                     | ++                   | NS                                        |
|                          | Havcr2 (TIM-3)  | + (34)                 | + (35)                              | + (36)                 | +++                   | 7.95                             | NS                     | +++                    | +++                  | +++                                       |
|                          | Lag3            | + (1)                  | + (37)                              | ND                     | +++                   | 347.33                           | +++                    | +++                    | +++                  | +++                                       |
|                          | Pdcd1 (PD-1)    | + (9)                  | + (38)                              | + (17)                 | +++                   | 383.95                           | +++                    | +++                    | --                   | NS                                        |
|                          | Tigit           | + (39)                 | + (40)                              | + (41)                 | +++                   | 190.61                           | +++                    | +++                    | NS                   | NS                                        |
| Cytokines                | Ebi3 (IL27b)    | ND                     | + (42)                              | ND                     | +++                   | 7.41                             | +++                    | +++                    | +                    | NS                                        |
|                          | Ifng            | + (43)                 | ND                                  | ND                     | +++                   | 71.48                            | +++                    | +++                    | +++                  | NS                                        |
|                          | Il10            | + (44)                 | + (45)                              | + (46)                 | +++                   | 94.78                            | +++                    | +++                    | +++                  | +++                                       |
|                          | Il21            | + (47)                 | ND                                  | + (48)                 | +++                   | 526.65                           | +++                    | +++                    | NS                   | ++                                        |
|                          | Il4             | - (44)                 | ND                                  | + (49)                 | +++                   | 13.22                            | +++                    | +++                    | -                    | NS                                        |
|                          | Il5             | + (44)                 | ND                                  | ND                     | NS                    | 0.01                             | NS                     | NS                     | NS                   | NS                                        |
|                          | Mucb (Areg)     | +                      | + (50)                              | ND                     | NS                    | 0.15                             | NS                     | NS                     | NS                   | NS                                        |
| Cytokine receptors       | Tgfb1           | + (44)                 | + (45)                              | ND                     | NS                    | 114.49                           | NS                     | NS                     | NS                   | NS                                        |
|                          | Il10ra          | + (51)                 | + (52)                              | ND                     | ++                    | 128.32                           | NS                     | ++                     | ++                   | NS                                        |
|                          | Il12rb2         | ND                     | + (53)                              | ND                     | -                     | 1.44                             | +++                    | +++                    | --                   | NS                                        |
|                          | Il21r           | + (47)                 | + (54)                              | + (48)                 | -                     | 179.90                           | -                      | -                      | -                    | NS                                        |
|                          | Il27ra          | + (55)                 | + (56)                              | + (57)                 | +                     | 339.18                           | -                      | NS                     | +                    | NS                                        |
|                          | IL7r (CD127)    | - (21)                 | - (58)                              | - (59)                 | ---                   | 72.10                            | ---                    | ---                    | +++                  | NS                                        |
|                          | IL17rc          | ND                     | ND                                  | ND                     | NS                    | 0.03                             | NS                     | NS                     | NS                   | NS                                        |
|                          | Il2ra (CD25)    | - (18)                 | + (60)                              | - (61)                 | --                    | 29.27                            | --                     | NS                     | +++                  | NS                                        |
| Tgfbbr1                  | - (51)          | + (62)                 | ND                                  | NS                     | 42.88                 | +                                | NS                     | -                      | NS                   |                                           |
| Other                    | Tgfbbr2         | - (51)                 | + (63)                              | ND                     | -                     | 384.31                           | -                      | -                      | NS                   | NS                                        |
|                          | Tgfbbr3         | - (51)                 | ND                                  | ND                     | -                     | 100.03                           | --                     | -                      | ++                   | NS                                        |
|                          | Atf6            | - (51)                 | ND                                  | ND                     | ++                    | 32.87                            | +++                    | +++                    | NS                   | +                                         |
|                          | Ahr             | + (64)                 | ND                                  | ND                     | +++                   | 35.42                            | NS                     | +++                    | +++                  | +++                                       |
|                          | Ajuba           | ND                     | ND                                  | ND                     | +++                   | 1.89                             | NS                     | +++                    | +++                  | +++                                       |
|                          | Ascl2           | ND                     | ND                                  | + (65)                 | +++                   | 35.56                            | +++                    | +++                    | -                    | NS                                        |
|                          | Bach2           | - (66)                 | + (67)                              | - (68)                 | ---                   | 24.69                            | ---                    | ---                    | ++                   | NS                                        |
|                          | Batf            | + (69)                 | ND                                  | + (70)                 | +                     | 61.67                            | +++                    | ++                     | -                    | NS                                        |
|                          | Bcl6            | ND                     | ND                                  | + (71)                 | +++                   | 238.34                           | +++                    | +++                    | --                   | NS                                        |
|                          | Bhlhe40         | + (51)                 | ND                                  | ND                     | ++                    | 202.27                           | +++                    | +++                    | ++                   | +                                         |
| Bmyc                     | - (51)          | ND                     | ND                                  | -                      | 11.15                 | -                                | NS                     | NS                     | NS                   |                                           |
| Cbfa2t3                  | ND              | ND                     | ND                                  | +++                    | 25.96                 | +++                              | +++                    | -                      | NS                   |                                           |

|                       |                   |        |        |        |         |        |     |     |     |     |
|-----------------------|-------------------|--------|--------|--------|---------|--------|-----|-----|-----|-----|
| Transcription factors | Cebpa             | ND     | ND     | +(72)  | +++     | 91.15  | +++ | +++ | --  | NS  |
|                       | Dbp               | -(51)  | ND     | ND     | NS      | 16.29  | NS  | NS  | NS  | NS  |
|                       | E2f1              | +(51)  | +(73)  | ND     | NS      | 3.92   | NS  | NS  | NS  | NS  |
|                       | Egr2              | +(74)  | ND     | ND     | ++      | 61.63  | +++ | +++ | -   | NS  |
|                       | Elk4              | -(51)  | ND     | ND     | NS      | 172.79 | NS  | NS  | -   | NS  |
|                       | Eomes             | +(75)  | +(76)  | ND     | NS      | 12.71  | +   | +++ | ++  | --  |
|                       | FoxP1             | ND     | ND     | -(77)  | -       | 174.93 | --  | -   | +   | NS  |
|                       | FoxP3             | ND     | +(78)  | ND     | ---     | 30.31  | ++  | NS  | --  | --  |
|                       | Grhl1             | ND     | ND     | ND     | +++     | 38.45  | +++ | +++ | NS  | NS  |
|                       | Hmgb2             | +(51)  | ND     | ND     | +       | 38.12  | ++  | ++  | NS  | NS  |
|                       | Id2               | +(51)  | +(79)  | -(80)  | +       | 180.43 | -   | ++  | ++  | +   |
|                       | Id3               | -(51)  | +(79)  | +(80)  | +       | 37.87  | +++ | ++  | -   | NS  |
|                       | Irf1              | +(69)  | ND     | ND     | -       | 282.24 | -   | NS  | +   | NS  |
|                       | Irf4              | +(81)  | +(3)   | +(82)  | +++     | 186.65 | +++ | +++ | ++  | ++  |
|                       | Jdp2              | ND     | ND     | ND     | +++     | 11.36  | +++ | +++ | --  | NS  |
|                       | Klf2              | ND     | ND     | -(83)  | --      | 116.99 | --- | --  | +++ | NS  |
|                       | Lef1              | ND     | ND     | +(84)  | ---     | 69.23  | --- | --- | NS  | --  |
|                       | Lilrb4a           | ND     | +(85)  | ND     | #N/A    | 3.77   | +++ | +++ | NS  | NS  |
|                       | Maf               | +(47)  | ND     | +(86)  | +++     | 642.44 | +++ | +++ | -   | NS  |
|                       | Myb               | -(51)  | +(87)  | ND     | +       | 28.09  | +++ | ++  | NS  | NS  |
|                       | Mybl2             | +(51)  | ND     | ND     | NS      | 2.92   | ++  | NS  | --  | NS  |
|                       | Myc               | -(51)  | -(88)  | ND     | ---     | 19.34  | --- | --- | NS  | NS  |
|                       | Nfia              | ND     | ND     | ND     | +++     | 22.14  | +++ | +++ | --  | NS  |
|                       | Nfil3             | +(34)  | ND     | ND     | +++     | 62.68  | +++ | +++ | ++  | +   |
|                       | Nr1h3 (LXRα)      | +(51)  | +(89)  | ND     | NS      | 1.16   | ++  | NS  | -   | NS  |
|                       | Pax5              | ND     | ND     | ND     | +++     | 8.94   | +++ | +++ | --  | NS  |
|                       | Pax9              | ND     | ND     | ND     | +++     | 3.38   | +++ | +++ | ++  | +++ |
|                       | Pou2af1 (OcaB)    | ND     | ND     | ND     | +++     | 145.84 | +++ | +++ | -   | NS  |
|                       | Prdm1 (Blimp-1)   | +(90)  | ND     | +(91)  | +++     | 100.20 | NS  | +++ | +++ | ++  |
|                       | Rbpj              | +(51)  | +(92)  | ND     | +       | 73.40  | +   | ++  | +   | +   |
|                       | Runx2             | +(51)  | ND     | ND     | ++      | 43.71  | +++ | +++ | ++  | NS  |
|                       | Rora              | +(51)  | ND     | -(93)  | -       | 26.65  | +++ | +++ | --  | --  |
| S1pr1                 | ND                | ND     | -(83)  | --     | 141.34  | ---    | --  | ++  | --  |     |
| Six5                  | ND                | ND     | ND     | +++    | 14.88   | +++    | +++ | NS  | NS  |     |
| Sox4                  | -(51)             | -(94)  | ND     | ---    | 1.07    | NS     | --  | NS  | --- |     |
| Sox8                  | ND                | ND     | ND     | +++    | 1.29    | +++    | +++ | --  | NS  |     |
| Stat1                 | +(95)             | ND     | +(96)  | NS     | 617.27  | NS     | NS  | NS  | NS  |     |
| Stat3                 | +(97)             | ND     | +(23)  | +      | 345.04  | +      | +   | NS  | NS  |     |
| Stat4                 | ND                | -(98)  | +(99)  | +      | 142.56  | ++     | ++  | -   | NS  |     |
| Tbx21 (T-bet)         | +(75)             | ND     | -(84)  | ++     | 24.69   | +++    | +++ | ++  | ++  |     |
| Tcf7                  | ND                | ND     | +(84)  | NS     | 1519.30 | NS     | NS  | NS  | NS  |     |
| Tox2                  | ND                | ND     | +(80)  | +++    | 206.07  | +++    | +++ | --  | NS  |     |
| Vdr                   | ND                | +(100) | ND     | +++    | 65.44   | +++    | +++ | NS  | +++ |     |
| Zbtb16 (PLZF)         | +(51)             | ND     | ND     | ---    | 0.18    | NS     | NS  | NS  | NS  |     |
| Secretion proteins    | Chgb              | ND     | ND     | +(101) | NS      | 0.15   | NS  | NS  | NS  | NS  |
|                       | Gzmb (Granzyme B) | +(102) | +(103) | ND     | ++      | 11.54  | NS  | +++ | +++ | +++ |
| Enzymes               | Cblb              | ND     | +(104) | ND     | NS      | 169.82 | -   | +   | +   | NS  |
|                       | Entpd1 (CD39)     | +(105) | +(106) | ND     | +++     | 47.39  | +++ | +++ | +++ | ++  |
|                       | Itk               | +(107) | +(108) | ND     | NS      | 481.13 | +   | -   | -   | NS  |
|                       | Nt5e (CD73)       | +(105) | +(106) | +(109) | +++     | 268.63 | +++ | +++ | NS  | NS  |
|                       | Serpinc6b         | +(51)  | +(110) | ND     | +       | 19.23  | ++  | ++  | NS  | NS  |
| Serpinc9              | +(51)             | ND     | ND     | +      | 23.74   | NS     | +   | NS  | NS  |     |

+++ **FC>4**  
 ++ **4>FC>2**  
 + **2>FC>1**  
 NS **1>FC>1**  
 - **-1>FC>2**  
 -- **-2>FC>4**  
 --- **FC<-4**

Same results vs both KLH-induced TFH and Tet-/CXCR5+/PD-1+ cells from pMHCII-NP-treated mice  
 Different results vs both KLH-induced TFH and Tet-/CXCR5+/PD-1+ cells from pMHCII-NP-treated mice  
Text in red Normalized counts below expression cut-off

## REFERENCES FOR SUPPLEMENTARY TABLE 1

1. Gagliani, N. *et al.* Coexpression of CD49b and LAG-3 identifies human and mouse T regulatory type 1 cells. *Nat. Med.* **19**, 739-746 (2013).
2. Duan, W., So, T., Mehta, A.K., Choi, H. & Croft, M. Inducible CD4+LAP+Foxp3- regulatory T cells suppress allergic inflammation. *J. Immunol.* **187**, 6499-6507 (2011).
3. Cretney, E. *et al.* The transcription factors Blimp-1 and IRF4 jointly control the differentiation and function of effector regulatory T cells. *Nat. Immunol.* **12**, 304-311 (2011).
4. Moriyama, S. *et al.* Sphingosine-1-phosphate receptor 2 is critical for follicular helper T cell retention in germinal centers. *J. Exp. Med.* **211**, 1297-1305 (2014).
5. Bollyky, P.L. *et al.* ECM components guide IL-10 producing regulatory T-cell (TR1) induction from effector memory T-cell precursors. *Proc. Natl. Acad. Sci. U. S. A.* **108**, 7938-7943 (2011).
6. Biswas, M., Kumar, S.R.P., Terhorst, C. & Herzog, R.W. Gene Therapy With Regulatory T Cells: A Beneficial Alliance. *Front. Immunol.* **9**, 554 (2018).
7. Fazilleau, N., McHeyzer-Williams, L.J., Rosen, H. & McHeyzer-Williams, M.G. The function of follicular helper T cells is regulated by the strength of T cell antigen receptor binding. *Nat. Immunol.* **10**, 375-384 (2009).
8. Poholek, A.C. *et al.* In vivo regulation of Bcl6 and T follicular helper cell development. *J. Immunol.* **185**, 313-326 (2010).
9. Alfen, J.S. *et al.* Intestinal IFN-gamma-producing type 1 regulatory T cells coexpress CCR5 and programmed cell death protein 1 and downregulate IL-10 in the inflamed guts of patients with inflammatory bowel disease. *J. Allergy Clin. Immunol.* **142**, 1537-1547 e1538 (2018).
10. Bystry, R.S., Aluvihare, V., Welch, K.A., Kallikourdis, M. & Betz, A.G. B cells and professional APCs recruit regulatory T cells via CCL4. *Nat. Immunol.* **2**, 1126-1132 (2001).
11. Miller, S.M. *et al.* Follicular Regulatory T Cells Are Highly Permissive to R5-Tropic HIV-1. *J. Virol.* **91** (2017).
12. Smigielski, K.S. *et al.* CCR7 provides localized access to IL-2 and defines homeostatically distinct regulatory T cell subsets. *J. Exp. Med.* **211**, 121-136 (2014).
13. Haynes, N.M. *et al.* Role of CXCR5 and CCR7 in follicular Th cell positioning and appearance of a programmed cell death gene-1high germinal center-associated subpopulation. *J. Immunol.* **179**, 5099-5108 (2007).
14. Kunicki, M.A., Amaya Hernandez, L.C., Davis, K.L., Bacchetta, R. & Roncarolo, M.G. Identity and Diversity of Human Peripheral Th and T Regulatory Cells Defined by Single-Cell Mass Cytometry. *J. Immunol.* **200**, 336-346 (2018).

15. Chevalier, N. Quantifying helper cell function of human TFH cells in vitro. *Methods Mol. Biol.* **1291**, 209-226 (2015).
16. Allen, C.D. *et al.* Germinal center dark and light zone organization is mediated by CXCR4 and CXCR5. *Nat. Immunol.* **5**, 943-952 (2004).
17. Crotty, S. Follicular helper CD4 T cells (TFH). *Annu. Rev. Immunol.* **29**, 621-663 (2011).
18. Zeng, H., Zhang, R., Jin, B. & Chen, L. Type 1 regulatory T cells: a new mechanism of peripheral immune tolerance. *Cell. Mol. Immunol.* **12**, 566-571 (2015).
19. Linterman, M.A. *et al.* CD28 expression is required after T cell priming for helper T cell responses and protective immunity to infection. *Elife* **3** (2014).
20. Vinuesa, C.G., Tangye, S.G., Moser, B. & Mackay, C.R. Follicular B helper T cells in antibody responses and autoimmunity. *Nat. Rev. Immunol.* **5**, 853-865 (2005).
21. Haringer, B., Lozza, L., Steckel, B. & Geginat, J. Identification and characterization of IL-10/IFN-gamma-producing effector-like T cells with regulatory function in human blood. *J. Exp. Med.* **206**, 1009-1017 (2009).
22. Strauss, L. *et al.* Expression of ICOS on human melanoma-infiltrating CD4+CD25highFoxp3+ T regulatory cells: implications and impact on tumor-mediated immune suppression. *J. Immunol.* **180**, 2967-2980 (2008).
23. Nurieva, R.I. *et al.* Generation of T follicular helper cells is mediated by interleukin-21 but independent of T helper 1, 2, or 17 cell lineages. *Immunity* **29**, 138-149 (2008).
24. Fujio, K., Okamura, T. & Yamamoto, K. The Family of IL-10-secreting CD4+ T cells. *Adv. Immunol.* **105**, 99-130 (2010).
25. Crotty, S., Kersh, E.N., Cannons, J., Schwartzberg, P.L. & Ahmed, R. SAP is required for generating long-term humoral immunity. *Nature* **421**, 282-287 (2003).
26. Ito, T. *et al.* OX40 ligand shuts down IL-10-producing regulatory T cells. *Proc. Natl. Acad. Sci. U. S. A.* **103**, 13138-13143 (2006).
27. Fontenot, J.D. *et al.* Regulatory T cell lineage specification by the forkhead transcription factor foxp3. *Immunity* **22**, 329-341 (2005).
28. Jacquemin, C. *et al.* OX40 Ligand Contributes to Human Lupus Pathogenesis by Promoting T Follicular Helper Response. *Immunity* **42**, 1159-1170 (2015).
29. Shimizu, J., Yamazaki, S., Takahashi, T., Ishida, Y. & Sakaguchi, S. Stimulation of CD25(+)CD4(+) regulatory T cells through GITR breaks immunological self-tolerance. *Nat. Immunol.* **3**, 135-142 (2002).
30. Bacchetta, R. *et al.* Growth and expansion of human T regulatory type 1 cells are independent from TCR activation but require exogenous cytokines. *Eur. J. Immunol.* **32**, 2237-2245 (2002).

31. Walker, L.S. Treg and CTLA-4: two intertwining pathways to immune tolerance. *J. Autoimmun.* **45**, 49-57 (2013).
32. Sage, P.T., Paterson, A.M., Lovitch, S.B. & Sharpe, A.H. The coinhibitory receptor CTLA-4 controls B cell responses by modulating T follicular helper, T follicular regulatory, and T regulatory cells. *Immunity* **41**, 1026-1039 (2014).
33. Gorbachev, A.V. & Fairchild, R.L. CD4+CD25+ regulatory T cells utilize FasL as a mechanism to restrict DC priming functions in cutaneous immune responses. *Eur. J. Immunol.* **40**, 2006-2015 (2010).
34. Zhu, C. *et al.* An IL-27/NFIL3 signalling axis drives Tim-3 and IL-10 expression and T-cell dysfunction. *Nat. Comm.* **6**, 6072 (2015).
35. Gupta, S. *et al.* Allograft rejection is restrained by short-lived TIM-3+PD-1+Foxp3+ Tregs. *J. Clin. Invest.* **122**, 2395-2404 (2012).
36. Zhu, S., Lin, J., Qiao, G., Wang, X. & Xu, Y. Tim-3 identifies exhausted follicular helper T cells in breast cancer patients. *Immunobiology* **221**, 986-993 (2016).
37. Huang, C.T. *et al.* Role of LAG-3 in regulatory T cells. *Immunity* **21**, 503-513 (2004).
38. Chen, X. *et al.* PD-1 regulates extrathymic regulatory T-cell differentiation. *Eur. J. Immunol.* **44**, 2603-2616 (2014).
39. Burton, B.R. *et al.* Sequential transcriptional changes dictate safe and effective antigen-specific immunotherapy. *Nat. Comm.* **5**, 4741 (2014).
40. Yu, X. *et al.* The surface protein TIGIT suppresses T cell activation by promoting the generation of mature immunoregulatory dendritic cells. *Nat. Immunol.* **10**, 48-57 (2009).
41. Godefroy, E., Zhong, H., Pham, P., Friedman, D. & Yazdanbakhsh, K. TIGIT-positive circulating follicular helper T cells display robust B-cell help functions: potential role in sickle cell alloimmunization. *Haematologica* **100**, 1415-1425 (2015).
42. Collison, L.W. *et al.* The inhibitory cytokine IL-35 contributes to regulatory T-cell function. *Nature* **450**, 566-569 (2007).
43. Facciotti, F. *et al.* IL-10-producing forkhead box protein 3-negative regulatory T cells inhibit B-cell responses and are involved in systemic lupus erythematosus. *J. Allergy Clin. Immunol.* **137**, 318-321 e315 (2016).
44. Groux, H. *et al.* A CD4+ T-cell subset inhibits antigen-specific T-cell responses and prevents colitis. *Nature* **389**, 737-742 (1997).
45. Liu, H., Hu, B., Xu, D. & Liew, F.Y. CD4+CD25+ regulatory T cells cure murine colitis: the role of IL-10, TGF-beta, and CTLA4. *J. Immunol.* **171**, 5012-5017 (2003).
46. Zhu, Y., Zou, L. & Liu, Y.C. T follicular helper cells, T follicular regulatory cells and autoimmunity. *Int. Immunol.* **28**, 173-179 (2016).

47. Pot, C. *et al.* Cutting edge: IL-27 induces the transcription factor c-Maf, cytokine IL-21, and the costimulatory receptor ICOS that coordinately act together to promote differentiation of IL-10-producing Tr1 cells. *J. Immunol.* **183**, 797-801 (2009).
48. Chtanova, T. *et al.* T follicular helper cells express a distinctive transcriptional profile, reflecting their role as non-Th1/Th2 effector cells that provide help for B cells. *J. Immunol.* **173**, 68-78 (2004).
49. King, I.L. & Mohrs, M. IL-4-producing CD4+ T cells in reactive lymph nodes during helminth infection are T follicular helper cells. *J. Exp. Med.* **206**, 1001-1007 (2009).
50. Burzyn, D. *et al.* A special population of regulatory T cells potentiates muscle repair. *Cell* **155**, 1282-1295 (2013).
51. Brockmann, L. *et al.* Molecular and functional heterogeneity of IL-10-producing CD4(+) T cells. *Nat. Comm.* **9**, 5457 (2018).
52. Diefenhardt, P. *et al.* IL-10 Receptor Signaling Empowers Regulatory T Cells to Control Th17 Responses and Protect from GN. *J. Am. Soc. Nephrol.* **29**, 1825-1837 (2018).
53. Zhao, Z. *et al.* IL-12R beta 2 promotes the development of CD4+CD25+ regulatory T cells. *J. Immunol.* **181**, 3870-3876 (2008).
54. Comes, A. *et al.* CD25+ regulatory T cell depletion augments immunotherapy of micrometastases by an IL-21-secreting cellular vaccine. *J. Immunol.* **176**, 1750-1758 (2006).
55. Meka, R.R., Venkatesha, S.H., Dudics, S., Acharya, B. & Moudgil, K.D. IL-27-induced modulation of autoimmunity and its therapeutic potential. *Autoimmun Rev* **14**, 1131-1141 (2015).
56. Villarino, A.V. *et al.* Positive and negative regulation of the IL-27 receptor during lymphoid cell activation. *J. Immunol.* **174**, 7684-7691 (2005).
57. Batten, M. *et al.* IL-27 supports germinal center function by enhancing IL-21 production and the function of T follicular helper cells. *J. Exp. Med.* **207**, 2895-2906 (2010).
58. Liu, W. *et al.* CD127 expression inversely correlates with FoxP3 and suppressive function of human CD4+ T reg cells. *J. Exp. Med.* **203**, 1701-1711 (2006).
59. McDonald, P.W. *et al.* IL-7 signalling represses Bcl-6 and the TFH gene program. *Nat. Comm.* **7**, 10285 (2016).
60. Sakaguchi, S., Sakaguchi, N., Asano, M., Itoh, M. & Toda, M. Immunologic self-tolerance maintained by activated T cells expressing IL-2 receptor alpha-chains (CD25). Breakdown of a single mechanism of self-tolerance causes various autoimmune diseases. *J. Immunol.* **155**, 1151-1164 (1995).
61. Ballesteros-Tato, A. *et al.* Interleukin-2 inhibits germinal center formation by limiting T follicular helper cell differentiation. *Immunity* **36**, 847-856 (2012).

62. Liu, Y. *et al.* A critical function for TGF-beta signaling in the development of natural CD4+CD25+Foxp3+ regulatory T cells. *Nat. Immunol.* **9**, 632-640 (2008).
63. Ouyang, W., Beckett, O., Ma, Q. & Li, M.O. Transforming growth factor-beta signaling curbs thymic negative selection promoting regulatory T cell development. *Immunity* **32**, 642-653 (2010).
64. Apetoh, L. *et al.* The aryl hydrocarbon receptor interacts with c-Maf to promote the differentiation of type 1 regulatory T cells induced by IL-27. *Nat. Immunol.* **11**, 854-861 (2010).
65. Liu, X. *et al.* Transcription factor achaete-scute homologue 2 initiates follicular T-helper-cell development. *Nature* **507**, 513-518 (2014).
66. Edwards, C.L. *et al.* The Role of BACH2 in T Cells in Experimental Malaria Caused by *Plasmodium chabaudi chabaudi* AS. *Front. Immunol.* **9**, 2578 (2018).
67. Grant, F.M. *et al.* BACH2 drives quiescence and maintenance of resting Treg cells to promote homeostasis and cancer immunosuppression. *J. Exp. Med.* **217** (2020).
68. Lahmann, A. *et al.* Bach2 Controls T Follicular Helper Cells by Direct Repression of Bcl-6. *J. Immunol.* **202**, 2229-2239 (2019).
69. Karwacz, K. *et al.* Critical role of IRF1 and BATF in forming chromatin landscape during type 1 regulatory cell differentiation. *Nat. Immunol.* **18**, 412-421 (2017).
70. Ise, W. *et al.* The transcription factor BATF controls the global regulators of class-switch recombination in both B cells and T cells. *Nat. Immunol.* **12**, 536-543 (2011).
71. Nurieva, R.I. *et al.* Bcl6 mediates the development of T follicular helper cells. *Science* **325**, 1001-1005 (2009).
72. Tanaka, S. *et al.* CCAAT/enhancer-binding protein alpha negatively regulates IFN-gamma expression in T cells. *J. Immunol.* **193**, 6152-6160 (2014).
73. Bao, R. *et al.* Adenosine and the adenosine A2A receptor agonist, CGS21680, upregulate CD39 and CD73 expression through E2F-1 and CREB in regulatory T cells isolated from septic mice. *Int. J. Mol. Med.* **38**, 969-975 (2016).
74. Okamura, T. *et al.* CD4+CD25-LAG3+ regulatory T cells controlled by the transcription factor Egr-2. *Proc. Natl. Acad. Sci. U. S. A.* **106**, 13974-13979 (2009).
75. Zhang, P. *et al.* Eomesodermin promotes the development of type 1 regulatory T (TR1) cells. *Sci Immunol* **2** (2017).
76. Schaer, D.A. *et al.* GITR pathway activation abrogates tumor immune suppression through loss of regulatory T cell lineage stability. *Cancer Immunol Res* **1**, 320-331 (2013).
77. Wang, H. *et al.* The transcription factor Foxp1 is a critical negative regulator of the differentiation of follicular helper T cells. *Nat. Immunol.* **15**, 667-675 (2014).

78. Hori, S., Nomura, T. & Sakaguchi, S. Control of regulatory T cell development by the transcription factor Foxp3. *Science* **299**, 1057-1061 (2003).
79. Miyazaki, M. *et al.* Id2 and Id3 maintain the regulatory T cell pool to suppress inflammatory disease. *Nat. Immunol.* **15**, 767-776 (2014).
80. Choi, Y.S. *et al.* Bcl6 expressing follicular helper CD4 T cells are fate committed early and have the capacity to form memory. *J. Immunol.* **190**, 4014-4026 (2013).
81. Jin, J.O., Han, X. & Yu, Q. Interleukin-6 induces the generation of IL-10-producing Tr1 cells and suppresses autoimmune tissue inflammation. *J. Autoimmun.* **40**, 28-44 (2013).
82. Kwon, H. *et al.* Analysis of interleukin-21-induced Prdm1 gene regulation reveals functional cooperation of STAT3 and IRF4 transcription factors. *Immunity* **31**, 941-952 (2009).
83. Lee, J.Y. *et al.* The transcription factor KLF2 restrains CD4(+) T follicular helper cell differentiation. *Immunity* **42**, 252-264 (2015).
84. Choi, Y.S. *et al.* LEF-1 and TCF-1 orchestrate T(FH) differentiation by regulating differentiation circuits upstream of the transcriptional repressor Bcl6. *Nat. Immunol.* **16**, 980-990 (2015).
85. Ulges, A. *et al.* Protein kinase CK2 enables regulatory T cells to suppress excessive TH2 responses in vivo. *Nat. Immunol.* **16**, 267-275 (2015).
86. Bauquet, A.T. *et al.* The costimulatory molecule ICOS regulates the expression of c-Maf and IL-21 in the development of follicular T helper cells and TH-17 cells. *Nat. Immunol.* **10**, 167-175 (2009).
87. Dias, S. *et al.* Effector Regulatory T Cell Differentiation and Immune Homeostasis Depend on the Transcription Factor Myb. *Immunity* **46**, 78-91 (2017).
88. Angelin, A. *et al.* Foxp3 Reprograms T Cell Metabolism to Function in Low-Glucose, High-Lactate Environments. *Cell Metab.* **25**, 1282-1293 e1287 (2017).
89. Herold, M. *et al.* Liver X receptor activation promotes differentiation of regulatory T cells. *PLoS One* **12**, e0184985 (2017).
90. Heinemann, C. *et al.* IL-27 and IL-12 oppose pro-inflammatory IL-23 in CD4+ T cells by inducing Blimp1. *Nat. Comm.* **5**, 3770 (2014).
91. Johnston, R.J. *et al.* Bcl6 and Blimp-1 are reciprocal and antagonistic regulators of T follicular helper cell differentiation. *Science* **325**, 1006-1010 (2009).
92. Fu, T. *et al.* Accelerated acute allograft rejection accompanied by enhanced T-cell proliferation and attenuated Treg function in RBP-J deficient mice. *Mol. Immunol.* **48**, 751-759 (2011).



93. Baumjohann, D. *et al.* The microRNA cluster miR-17 approximately 92 promotes TFH cell differentiation and represses subset-inappropriate gene expression. *Nat. Immunol.* **14**, 840-848 (2013).
94. Komatsu, N. *et al.* Pathogenic conversion of Foxp3+ T cells into TH17 cells in autoimmune arthritis. *Nat. Med.* **20**, 62-68 (2014).
95. Wang, H. *et al.* IL-27 induces the differentiation of Tr1-like cells from human naive CD4+ T cells via the phosphorylation of STAT1 and STAT3. *Immunol. Lett.* **136**, 21-28 (2011).
96. Choi, Y.S., Eto, D., Yang, J.A., Lao, C. & Crotty, S. Cutting edge: STAT1 is required for IL-6-mediated Bcl6 induction for early follicular helper cell differentiation. *J. Immunol.* **190**, 3049-3053 (2013).
97. Iwasaki, Y. *et al.* Egr-2 transcription factor is required for Blimp-1-mediated IL-10 production in IL-27-stimulated CD4+ T cells. *Eur. J. Immunol.* **43**, 1063-1073 (2013).
98. Koch, M.A. *et al.* T-bet(+) Treg cells undergo abortive Th1 cell differentiation due to impaired expression of IL-12 receptor beta2. *Immunity* **37**, 501-510 (2012).
99. Schmitt, N. *et al.* IL-12 receptor beta1 deficiency alters in vivo T follicular helper cell response in humans. *Blood* **121**, 3375-3385 (2013).
100. Ghoreishi, M. *et al.* Expansion of antigen-specific regulatory T cells with the topical vitamin d analog calcipotriol. *J. Immunol.* **182**, 6071-6078 (2009).
101. Papa, I. *et al.* TFH-derived dopamine accelerates productive synapses in germinal centres. *Nature* **547**, 318-323 (2017).
102. Grossman, W.J. *et al.* Differential expression of granzymes A and B in human cytotoxic lymphocyte subsets and T regulatory cells. *Blood* **104**, 2840-2848 (2004).
103. Cao, X. *et al.* Granzyme B and perforin are important for regulatory T cell-mediated suppression of tumor clearance. *Immunity* **27**, 635-646 (2007).
104. Chen, Z. *et al.* Ubiquitination signals critical to regulatory T cell development and function. *Int. Immunopharmacol.* **16**, 348-352 (2013).
105. Mandapathil, M. *et al.* Adenosine and prostaglandin E2 cooperate in the suppression of immune responses mediated by adaptive regulatory T cells. *J. Biol. Chem.* **285**, 27571-27580 (2010).
106. Deaglio, S. *et al.* Adenosine generation catalyzed by CD39 and CD73 expressed on regulatory T cells mediates immune suppression. *J. Exp. Med.* **204**, 1257-1265 (2007).
107. Huang, W., Solouki, S., Koylass, N., Zheng, S.G. & August, A. ITK signalling via the Ras/IRF4 pathway regulates the development and function of Tr1 cells. *Nat. Comm.* **8**, 15871 (2017).

108. Huang, W., Jeong, A.R., Kannan, A.K., Huang, L. & August, A. IL-2-inducible T cell kinase tunes T regulatory cell development and is required for suppressive function. *J. Immunol.* **193**, 2267-2272 (2014).
109. Iyer, S.S. *et al.* Identification of novel markers for mouse CD4(+) T follicular helper cells. *Eur. J. Immunol.* **43**, 3219-3232 (2013).
110. Azzi, J. *et al.* Serine protease inhibitor 6 plays a critical role in protecting murine granzyme B-producing regulatory T cells. *J. Immunol.* **191**, 2319-2327 (2013).

Supplementary Table 2. Differential expression (DE) of 106 TR1/TFH/Treg-relevant genes in BDC2.5mi/IAg7 and FlA462/IAb Tet+ vs. Tconv cells (bulk RNAseq)

| Gene type                | Genes (protein) | DE in BDC2.5mi/IAg7 Tet+ (vs. Tet-) | Expressed in BDC2.5mi/IAg7 Tet+ (normalized counts) | DE in FLA462/IAb Tet+ (vs. Tet-) | Expressed in FLA462/IAb Tet+ (normalized counts) |
|--------------------------|-----------------|-------------------------------------|-----------------------------------------------------|----------------------------------|--------------------------------------------------|
| Cell adhesion molecules  | Cd226           | +                                   | 65.23                                               | +                                | 45.99                                            |
|                          | Itgae2 (CD49b)  | --                                  | 1.38                                                | NS                               | 0.54                                             |
|                          | Itgae (CD103)   | -                                   | 6.21                                                | --                               | 2.25                                             |
|                          | Ocln            | ++                                  | 3.13                                                | NS                               | 1.79                                             |
|                          | S1pr2           | ++                                  | 100.76                                              | ++                               | 61.50                                            |
|                          | Sell (CD62L)    | --                                  | 101.52                                              | --                               | 81.91                                            |
|                          | Selp1g (Psgl1)  | --                                  | 184.73                                              | --                               | 139.53                                           |
| Chemokine receptors      | Ccr5            | ++                                  | 47.50                                               | NS                               | 16.18                                            |
|                          | Ccr7            | --                                  | 174.10                                              | --                               | 1096.60                                          |
|                          | Cxcr3           | ++                                  | 153.84                                              | NS                               | 83.47                                            |
|                          | Cxcr4           | NS                                  | 188.11                                              | ++                               | 264.57                                           |
|                          | Cxcr5           | ++                                  | 380.73                                              | ++                               | 225.33                                           |
| Co-stimulatory molecules | Cd28            | ++                                  | 627.72                                              | NS                               | 1127.26                                          |
|                          | Cd40lg          | +                                   | 182.86                                              | +                                | 412.86                                           |
|                          | Icos            | ++                                  | 337.09                                              | NS                               | 593.69                                           |
|                          | Klrk1 (NKG2D)   | --                                  | 0.24                                                | NS                               | 0.22                                             |
|                          | Sh2d1a (SAP)    | +                                   | 78.17                                               | ++                               | 131.28                                           |
|                          | Tnfrsf4 (Ox40)  | ++                                  | 150.36                                              | NS                               | 329.34                                           |
|                          | Tnfrsf18 (GITR) | +                                   | 128.13                                              | NS                               | 135.06                                           |
| Tnfrsf4 (Ox40L)          | ++              | 1.93                                | ++                                                  | 6.89                             |                                                  |
| Co-inhibitory molecules  | Ctla4           | ++                                  | 663.75                                              | ++                               | 418.96                                           |
|                          | Fasl            | --                                  | 4.58                                                | NS                               | 37.41                                            |
|                          | Havcr2 (TIM-3)  | ++                                  | 7.95                                                | NS                               | 1.05                                             |
|                          | Lag3            | ++                                  | 347.33                                              | ++                               | 56.39                                            |
|                          | Pdcd1 (PD-1)    | ++                                  | 383.95                                              | ++                               | 508.50                                           |
|                          | Tigit           | ++                                  | 190.61                                              | ++                               | 104.86                                           |
| Cytokines                | Ebi3 (IL27b)    | ++                                  | 7.41                                                | ++                               | 13.92                                            |
|                          | Ifng            | ++                                  | 71.48                                               | ++                               | 68.87                                            |
|                          | Il10            | ++                                  | 94.78                                               | ++                               | 45.89                                            |
|                          | Il21            | ++                                  | 526.65                                              | ++                               | 238.83                                           |
|                          | Il4             | ++                                  | 13.22                                               | ++                               | 27.38                                            |
|                          | Il5             | NS                                  | 0.01                                                | #N/A                             | #N/A                                             |
|                          | Mcub (Areg)     | NS                                  | 0.15                                                | NS                               | 15.43                                            |
| Tgfb1                    | NS              | 114.49                              | NS                                                  | 172.54                           |                                                  |
| Cytokine receptors       | Il10ra          | ++                                  | 128.32                                              | NS                               | 31.50                                            |
|                          | Il12rb2         | -                                   | 1.44                                                | --                               | 1.38                                             |
|                          | Il21r           | -                                   | 179.90                                              | --                               | 297.94                                           |
|                          | Il27ra          | +                                   | 339.18                                              | NS                               | 342.57                                           |
|                          | IL7r (CD127)    | --                                  | 72.10                                               | --                               | 49.43                                            |
|                          | IL17rc          | NS                                  | 0.03                                                | NS                               | 0.22                                             |
|                          | Il2ra (CD25)    | --                                  | 29.27                                               | --                               | 6.04                                             |
|                          | Tgfb1           | NS                                  | 42.88                                               | NS                               | 26.98                                            |
| Tgfb2                    | -               | 384.31                              | NS                                                  | 444.77                           |                                                  |
| Tgfb3                    | -               | 100.03                              | -                                                   | 45.09                            |                                                  |
|                          | Atf6            | ++                                  | 32.87                                               | NS                               | 29.05                                            |
|                          | Ahr             | ++                                  | 35.42                                               | NS                               | 31.11                                            |
|                          | Ajuba           | ++                                  | 1.89                                                | NS                               | 0.70                                             |
|                          | Ascl2           | ++                                  | 35.56                                               | ++                               | 41.10                                            |
|                          | Batf            | +                                   | 61.67                                               | +                                | 117.71                                           |
|                          | Bcl6            | ++                                  | 238.34                                              | NS                               | 191.12                                           |
|                          | Bhlhe40         | ++                                  | 202.27                                              | ++                               | 1297.01                                          |
|                          | Bmyc            | -                                   | 11.15                                               | NS                               | 30.32                                            |
|                          | Cbfa2t3         | ++                                  | 25.96                                               | ++                               | 14.53                                            |
|                          | Cebpa           | ++                                  | 91.15                                               | ++                               | 50.92                                            |

|                       |                   |         |        |         |        |
|-----------------------|-------------------|---------|--------|---------|--------|
| Transcription factors | Dbp               | NS      | 16.29  | NS      | 8.41   |
|                       | E2f1              | NS      | 3.92   | NS      | 5.82   |
|                       | Egr2              | ++      | 61.63  | NS      | 96.53  |
|                       | Elk4              | NS      | 172.79 | NS      | 92.34  |
|                       | Eomes             | NS      | 12.71  | --      | 5.19   |
|                       | FoxP1             | -       | 174.93 | NS      | 282.05 |
|                       | FoxP3             | --      | 30.31  | --      | 16.33  |
|                       | Grhl1             | ++      | 38.45  | ++      | 12.01  |
|                       | Hmgb2             | +       | 38.12  | NS      | 121.17 |
|                       | Id2               | +       | 180.43 | NS      | 188.96 |
|                       | Id3               | +       | 37.87  | ++      | 35.49  |
|                       | Irf1              | -       | 282.24 | --      | 99.68  |
|                       | Irf4              | ++      | 186.65 | NS      | 22.46  |
|                       | Jdp2              | ++      | 11.36  | ++      | 10.75  |
|                       | Klf2              | --      | 116.99 | --      | 549.06 |
|                       | Lef1              | --      | 69.23  | --      | 211.71 |
|                       | Lilrb4a           | #N/A    | 0.00   | #N/A    | #N/A   |
|                       | Maf               | ++      | 642.44 | ++      | 346.78 |
|                       | Myb               | +       | 28.09  | -       | 51.48  |
|                       | Mybl2             | NS      | 2.92   | NS      | 1.57   |
|                       | Myc               | --      | 19.34  | NS      | 53.86  |
|                       | Nfia              | ++      | 22.14  | ++      | 13.47  |
|                       | Nfil3             | ++      | 62.68  | ++      | 320.66 |
|                       | Nr1h3 (LXRα)      | NS      | 1.16   | NS      | 2.13   |
|                       | Pax5              | ++      | 8.94   | ++      | 3.31   |
|                       | Pax9              | ++      | 3.38   | NS      | 0.45   |
|                       | Prdm1 (Blimp-1)   | ++      | 100.20 | NS      | 10.05  |
|                       | Rbpj              | +       | 73.40  | NS      | 76.01  |
|                       | Runx2             | ++      | 43.71  | NS      | 15.38  |
|                       | Rora              | -       | 26.65  | NS      | 161.75 |
|                       | S1pr1             | --      | 141.34 | --      | 363.10 |
|                       | Six5              | ++      | 14.88  | ++      | 1.14   |
|                       | Sox4              | --      | 1.07   | --      | 9.85   |
|                       | Sox8              | ++      | 1.29   | NS      | 0.93   |
|                       | Stat1             | NS      | 617.27 | NS      | 569.13 |
|                       | Stat3             | +       | 345.04 | NS      | 479.20 |
|                       | Stat4             | +       | 142.56 | +       | 175.61 |
| Tbx21 (T-bet)         | ++                | 24.69   | NS     | 47.35   |        |
| Tcf7                  | NS                | 1519.30 | +      | 2987.52 |        |
| Tox2                  | ++                | 206.07  | ++     | 649.25  |        |
| Vdr                   | ++                | 65.44   | ++     | 69.11   |        |
| Zbtb16 (PLZF)         | --                | 0.18    | --     | 0.41    |        |
| Secretion proteins    | Chgb              | NS      | 0.15   | #N/A    | #N/A   |
|                       | Gzmb (Granzyme B) | ++      | 11.54  | --      | 0.50   |
| Enzymes               | Cblb              | NS      | 169.82 | NS      | 238.13 |
|                       | Entpd1 (CD39)     | ++      | 47.39  | NS      | 13.66  |
|                       | Itk               | NS      | 481.13 | NS      | 633.92 |
|                       | Nt5e (CD73)       | ++      | 268.63 | ++      | 235.00 |
|                       | Serpib6b          | +       | 19.23  | NS      | 14.20  |
|                       | Serpib9           | +       | 23.74  | -       | 20.43  |

+++ *FC>4*   Expression consistent between *Tet+* cells  
 ++ *4>FC>2* Text in red Normalized counts below expression cut-off  
 + *2>FC>1* NA Not detected  
 NS *1>FC>-1* NS Non-significant  
 - *-1>FC>-2*  
 -- *-2>FC>-4*  
 --- *FC<-4*

Supplementary Table 3. Differential expression of the 106 TR1/TFH/Treg gene selection in the various SMARTseq2 and 10x scRNAseq cell clusters

| Gene type                | Genes           | SMARTseq2 of pooled Tet+ vs Tconv | 10X scRNAseq of pooled Tet+ vs Tconv | 10X scRNAseq BDC Tet+ vs INS Tet+ | 10x scRNAseq TR1 cluster vs Tconv cluster | 10x scRNAseq TFH cluster vs Tconv cluster | 10x scRNAseq TR1 cluster vs TFH cluster | Bulk RNAseq TFH vs Tconv |
|--------------------------|-----------------|-----------------------------------|--------------------------------------|-----------------------------------|-------------------------------------------|-------------------------------------------|-----------------------------------------|--------------------------|
| Cell adhesion molecules  | Cd226           | +++                               | NS                                   | NS                                | ++                                        | NS                                        | ++                                      | --                       |
|                          | Itga2 (CD49b)   | NS                                | NS                                   | --                                | ++                                        | NS                                        | +++                                     | ---                      |
|                          | Itgae (CD103)   | NS                                | NS                                   | --                                | +++                                       | NS                                        | +++                                     | NS                       |
|                          | Ocn             | NS                                | +++                                  | NS                                | +++                                       | +++                                       | NS                                      | NS                       |
|                          | S1pr2           | NS                                | +++                                  | NS                                | +++                                       | +++                                       | ---                                     | +++                      |
|                          | Sell (CD62L)    | ---                               | --                                   | NS                                | ---                                       | ---                                       | ++                                      | ---                      |
|                          | Selpg (Psg1)    | --                                | NS                                   | NS                                | NS                                        | ---                                       | ++                                      | ---                      |
| Chemokine receptors      | Ccr5            | NS                                | +++                                  | NS                                | +++                                       | +++                                       | +++                                     | +++                      |
|                          | Ccr7            | --                                | --                                   | NS                                | --                                        | ---                                       | ++                                      | ---                      |
|                          | Cxcr3           | +++                               | ++                                   | NS                                | +++                                       | +++                                       | ++                                      | +++                      |
|                          | Cxcr4           | +++                               | ++                                   | NS                                | NS                                        | +++                                       | ---                                     | +++                      |
|                          | Cxcr5           | +++                               | +++                                  | ++                                | +++                                       | +++                                       | ---                                     | +++                      |
| Co-stimulatory molecules | Cd28            | +++                               | NS                                   | NS                                | +                                         | ++                                        | NS                                      | ++                       |
|                          | Cd40lg          | +                                 | NS                                   | NS                                | NS                                        | ++                                        | -                                       | ++                       |
|                          | Icos            | +++                               | +++                                  | NS                                | +++                                       | +++                                       | NS                                      | +++                      |
|                          | Klrk1 (NKG2D)   | NS                                | NS                                   | NS                                | +++                                       | NS                                        | +++                                     | NS                       |
|                          | Sh2d1a (SAP)    | +                                 | NS                                   | NS                                | ++                                        | ++                                        | NS                                      | +++                      |
|                          | Tnfrsf4 (Ox40)  | +++                               | ++                                   | NS                                | +++                                       | +++                                       | ++                                      | +++                      |
|                          | Tnfrsf18 (GITR) | +++                               | NS                                   | NS                                | ++                                        | NS                                        | NS                                      | +                        |
|                          | Tnfrsf4 (Ox40L) | NS                                | ++                                   | NS                                | +++                                       | NS                                        | NS                                      | +++                      |
| Co-inhibitory molecules  | Ctla4           | +++                               | +++                                  | NS                                | +++                                       | +++                                       | ++                                      | +++                      |
|                          | Fasl            | +++                               | NS                                   | NS                                | ++                                        | --                                        | +++                                     | --                       |
|                          | Havcr2 (TIM-3)  | NS                                | +++                                  | --                                | +++                                       | +++                                       | +++                                     | NS                       |
|                          | Lag3            | +++                               | +++                                  | NS                                | +++                                       | +++                                       | NS                                      | +++                      |
|                          | Pdcd1 (PD-1)    | +++                               | +++                                  | NS                                | +++                                       | +++                                       | ---                                     | +++                      |
|                          | Tigit           | +++                               | +++                                  | NS                                | +++                                       | +++                                       | NS                                      | +++                      |
| Cytokines                | Ebi3 (IL27b)    | NS                                | +++                                  | NS                                | +++                                       | +++                                       | ++                                      | +++                      |
|                          | Ifng            | +++                               | ++                                   | NS                                | +++                                       | +++                                       | ++                                      | +++                      |
|                          | Il10            | +++                               | +++                                  | NS                                | +++                                       | +++                                       | +++                                     | +++                      |
|                          | Il21            | +++                               | +++                                  | NS                                | +++                                       | +++                                       | NS                                      | +++                      |
|                          | Il4             | +++                               | +++                                  | NS                                | +++                                       | +++                                       | ---                                     | +++                      |
|                          | Il5             | NS                                | #N/A                                 | #N/A                              | #N/A                                      | #N/A                                      | #N/A                                    | NS                       |
|                          | Mucb (Areg)     | NS                                | NS                                   | NS                                | NS                                        | NS                                        | NS                                      | NS                       |
|                          | Tgfb1           | NS                                | NS                                   | NS                                | NS                                        | NS                                        | NS                                      | NS                       |
|                          | Il10ra          | +++                               | +                                    | NS                                | +++                                       | ++                                        | NS                                      | NS                       |
|                          | Il12rb2         | NS                                | NS                                   | NS                                | +++                                       | NS                                        | ++                                      | +++                      |
| Cytokine receptors       | Il21r           | +++                               | NS                                   | NS                                | NS                                        | NS                                        | NS                                      | -                        |
|                          | Il27ra          | +                                 | NS                                   | NS                                | NS                                        | NS                                        | NS                                      | -                        |
|                          | IL7r (CD127)    | ---                               | --                                   | NS                                | --                                        | ---                                       | ++                                      | ---                      |
|                          | IL17rc          | NS                                | NS                                   | NS                                | NS                                        | NS                                        | NS                                      | NS                       |
|                          | Il2ra (CD25)    | ---                               | NS                                   | NS                                | ++                                        | NS                                        | +++                                     | --                       |
|                          | Tgfb1           | NS                                | NS                                   | NS                                | NS                                        | NS                                        | NS                                      | +                        |
|                          | Tgfb2           | ++                                | NS                                   | NS                                | NS                                        | NS                                        | NS                                      | -                        |
|                          | Tgfb3           | NS                                | NS                                   | NS                                | NS                                        | NS                                        | NS                                      | --                       |
|                          | Atf6            | NS                                | ++                                   | NS                                | +++                                       | +++                                       | NS                                      | +++                      |
|                          | Ahr             | NS                                | +++                                  | NS                                | +++                                       | +++                                       | +++                                     | NS                       |
| Ajuba                    | NS              | +++                               | NS                                   | +++                               | NS                                        | NS                                        | NS                                      |                          |
| Ascl2                    | +++             | +++                               | NS                                   | +++                               | +++                                       | ---                                       | +++                                     |                          |
| Bach2                    | ---             | --                                | NS                                   | --                                | ---                                       | +                                         | ---                                     |                          |
| Batf                     | +++             | NS                                | NS                                   | ++                                | ++                                        | NS                                        | +++                                     |                          |
| Bcl6                     | +++             | +++                               | NS                                   | ++                                | +++                                       | ---                                       | +++                                     |                          |
| Bhlhe40                  | +++             | ++                                | NS                                   | +++                               | +++                                       | NS                                        | +++                                     |                          |
| Bmyc                     | ---             | NS                                | NS                                   | NS                                | NS                                        | NS                                        | -                                       |                          |
| Cbfa2t3                  | NS              | +++                               | NS                                   | +++                               | +++                                       | ---                                       | +++                                     |                          |
| Cebpa                    | NS              | +++                               | NS                                   | +++                               | +++                                       | ---                                       | +++                                     |                          |
| Dbp                      | NS              | NS                                | NS                                   | NS                                | NS                                        | NS                                        | NS                                      |                          |
| E2f1                     | NS              | ++                                | --                                   | +++                               | NS                                        | ++                                        | NS                                      |                          |
| Egr2                     | NS              | ++                                | NS                                   | ++                                | +++                                       | --                                        | +++                                     |                          |
| Elk4                     | ++              | NS                                | NS                                   | NS                                | ++                                        | NS                                        | NS                                      |                          |
| Eomes                    | NS              | NS                                | NS                                   | ++                                | +++                                       | NS                                        | +                                       |                          |
| FoxP1                    | --              | NS                                | NS                                   | NS                                | NS                                        | NS                                        | --                                      |                          |
| FoxP3                    | ---             | NS                                | --                                   | +++                               | --                                        | +++                                       | ++                                      |                          |
| Grhl1                    | NS              | +++                               | ++                                   | +++                               | +++                                       | NS                                        | +++                                     |                          |
| Hmgb2                    | ++              | +                                 | NS                                   | ++                                | NS                                        | +                                         | ++                                      |                          |
| Id2                      | +++             | NS                                | NS                                   | ++                                | NS                                        | +                                         | -                                       |                          |
| Id3                      | -               | ++                                | ++                                   | NS                                | +++                                       | ---                                       | +++                                     |                          |
| Irf1                     | +++             | NS                                | NS                                   | NS                                | NS                                        | NS                                        | -                                       |                          |
| Irf4                     | NS              | ++                                | ++                                   | +++                               | ++                                        | ++                                        | +++                                     |                          |
| Jdp2                     | NS              | +++                               | NS                                   | +++                               | +++                                       | ---                                       | +++                                     |                          |

|                       |                    |                   |     |     |     |     |     |      |     |
|-----------------------|--------------------|-------------------|-----|-----|-----|-----|-----|------|-----|
| Transcription factors | Klf2               | ---               | NS  | --  | -   | --- | +++ | ---  |     |
|                       | Lef1               | ---               | --  | -   | --- | --- | NS  | ---  |     |
|                       | Lilrb4a            | NS                | ++  | --- | +++ | NS  | +++ | #N/A |     |
|                       | Maf                | +++               | +++ | NS  | +++ | +++ | NS  | +++  |     |
|                       | Myb                | NS                | ++  | NS  | ++  | +++ | NS  | +++  |     |
|                       | Mybl2              | NS                | NS  | NS  | +++ | NS  | +++ | ++   |     |
|                       | Myc                | ---               | --  | NS  | --  | --- | +++ | ---  |     |
|                       | Nfia               | +++               | +++ | NS  | +++ | +++ | --- | +++  |     |
|                       | Nfil3              | +++               | +++ | NS  | +++ | +++ | NS  | +++  |     |
|                       | Nr1h3 (LXRα)       | NS                | ++  | NS  | NS  | NS  | NS  | ++   |     |
|                       | Pax5               | NS                | +++ | NS  | ++  | +++ | --- | #N/A |     |
|                       | Pax9               | NS                | +++ | NS  | NS  | +++ | --- | +++  |     |
|                       | Pou2af1 (OcaB)     | NS                | +++ | ++  | +++ | +++ | NS  | +++  |     |
|                       | Prdm1 (Blimp-1)    | +++               | +++ | NS  | +++ | NS  | +++ | NS   |     |
|                       | Rbpj               | +++               | +   | NS  | ++  | +   | NS  | +    |     |
|                       | Runx2              | NS                | +++ | NS  | +++ | +++ | ++  | +++  |     |
|                       | Rora               | +                 | NS  | NS  | +++ | ++  | NS  | +++  |     |
|                       | S1pr1              | ---               | NS  | NS  | -   | --- | ++  | ---  |     |
|                       | Six5               | NS                | +++ | ++  | +++ | +++ | NS  | +++  |     |
|                       | Sox4               | NS                | NS  | NS  | --- | --- | NS  | NS   |     |
|                       | Sox8               | NS                | +++ | NS  | +++ | +++ | --- | +++  |     |
|                       | Stat1              | -                 | NS  | NS  | NS  | NS  | NS  | NS   |     |
|                       | Stat3              | +++               | NS  | NS  | NS  | +   | NS  | +    |     |
|                       | Stat4              | ++                | +   | NS  | ++  | ++  | NS  | ++   |     |
|                       | Tbx21 (T-bet)      | NS                | ++  | NS  | +++ | +++ | ++  | +++  |     |
|                       | Tcf7               | +                 | NS  | NS  | NS  | +   | --  | NS   |     |
|                       | Tox2               | +++               | +++ | NS  | +++ | +++ | --- | +++  |     |
|                       | Vdr                | NS                | +++ | NS  | +++ | +++ | NS  | +++  |     |
|                       | Zbtb16 (PLZF)      | NS                | NS  | NS  | +++ | NS  | +++ | NS   |     |
|                       | Secretion proteins | Chgb              | NS  | NS  | NS  | NS  | NS  | NS   |     |
|                       |                    | Gzmb (Granzyme B) | NS  | +++ | --- | +++ | NS  | +++  | NS  |
|                       | Enzymes            | Cblb              | NS  | NS  | NS  | NS  | NS  | -    |     |
|                       |                    | Entpd1 (CD39)     | NS  | +++ | NS  | +++ | +++ | ++   | +++ |
|                       |                    | Itk               | NS  | NS  | NS  | NS  | NS  | --   | +   |
|                       |                    | Nt5e (CD73)       | NS  | +++ | ++  | +++ | +++ | NS   | +++ |
|                       |                    | Serpnb6b          | NS  | ++  | NS  | +++ | ++  | NS   | ++  |
|                       | Serpnb9            | NS                | NS  | NS  | +   | +   | NS  | NS   |     |

+++

FC&gt;4

++

4&gt;FC&gt;2

+

2&gt;FC&gt;1

NS

1&gt;FC&gt;-1

-

-1&gt;FC&gt;-2

--

-2&gt;FC&gt;-4

---

FC&lt;-4

|  |                                                             |
|--|-------------------------------------------------------------|
|  | Upregulated                                                 |
|  | Downregulated                                               |
|  | scRNAseq concordant between BDC and Ins Tet+ cells          |
|  | scRNAseq non-concordant between BDC and Ins Tet+ cells      |
|  | Results concordant between TFH scRNAseq and TFH bulk RNAseq |
|  | Differences between TFH scRNAseq and TFH bulk RNAseq        |
|  | NS<br>Non-significant                                       |

Upregulated

Downregulated

scRNAseq concordant between BDC and Ins Tet+ cells

scRNAseq non-concordant between BDC and Ins Tet+ cells

Results concordant between TFH scRNAseq and TFH bulk RNAseq

Differences between TFH scRNAseq and TFH bulk RNAseq

NS  
Non-significant

Supplementary Table 4. Metal-labeled antibodies for Mass Cytometry

| Label | Target         | Clone     | Company        | Conc.(µg/ml) |
|-------|----------------|-----------|----------------|--------------|
| 114Cd | CD4            | RM4-5     | BD Biosciences | 2.5          |
| 169Tm | PE             | PE001     | BioLegend      | 5            |
| 172Yb | CXCR3          | CXCR3-173 | ThermoFisher   | 5            |
| 165Ho | Biotin         | 1D4C5     | Fluidigm       | 5            |
| 151Eu | CD28           | 37.51     | Fluidigm       | 5            |
| 176Yb | CD278 (ICOS)   | 7E.17G9   | Fluidigm       | 5            |
| 161Dy | CD134 (OX-40)  | OX-86     | BD Biosciences | 5            |
| 143Nd | CD357 (GITR)   | DTA1      | Fluidigm       | 5            |
| 173Yb | CD152 (CTLA-4) | UC10-4B9  | ThermoFisher   | 5            |
| 174Yb | CD223 (LAG-3)  | C9B7W     | Fluidigm       | 5            |
| 159Tb | CD279 (PD-1)   | J43       | Fluidigm       | 5            |
| 152Sm | TIGIT          | GIG7      | ThermoFisher   | 5            |
| 158Gd | IL-10          | JES5-16E3 | Fluidigm       | 5            |
| 160Gd | IL-21          | FFA21     | ThermoFisher   | 5            |
| 166Er | IL-4           | 11B11     | Fluidigm       | 5            |
| 168Er | AHR            | RPT9      | ThermoFisher   | 5            |
| 154Sm | BATF           | D7C5      | Fluidigm       | 5            |
| 163Dy | BCL-6          | K11291    | Fluidigm       | 5            |
| 170Er | CEBPalpha      | Rb Poly   | ThermoFisher   | 5            |
| 116Cd | EGR2           | EPR4004   | Abcam          | 5            |
| 145Nd | FoxP3          | FJK-16s   | ThermoFisher   | 5            |
| 147Sm | ID2            | E991      | Abbaxa         | 5            |
| 149Sm | IRF1           | EPR18301  | Abcam          | 5            |
| 155Gd | IRF4           | 3E4       | Fluidigm       | 5            |
| 146Nd | LEF1           | EPR2029Y  | Abcam          | 5            |
| 141Pr | cMaf           | sym0F1    | ThermoFisher   | 5            |
| 162Dy | NFIL3          | 1218A     | R&D systems    | 5            |
| 175Lu | PRDM1 (Blimp1) | 6D3       | BD Biosciences | 5            |
| 150Nd | STAT3          | 232209    | R&D systems    | 5            |
| 156Gd | STAT4          | 2H9L5     | ThermoFisher   | 5            |
| 153Eu | TBX21 (Tbet)   | 4B10      | BioLegend      | 5            |
| 171Yb | phospho-ITK    | A16064A   | BioLegend      | 5            |

\*Labeling was done using Maxpar X8 or MCP9 Antibody Labeling Kits (Fluidigm) except Fluidigm antibodies

Supplementary Table 5. Differential expression of 106 TR1/TFH/Treg-relevant genes in the Blimp1-dependent (TR1) and independent (TR1-like) vs. the TFH subcluster from pMHCII-NP-treated mice (10x scRNAseq)

| Gene type                | Gene name       | TR1 vs TR1-like | TR1-like vs TFH | TR1 vs TFH |
|--------------------------|-----------------|-----------------|-----------------|------------|
| Cell adhesion molecules  | Cd226           | -               | ++              | NS         |
|                          | Itga2 (CD49b)   | NS              | NS              | NS         |
|                          | Itgae (CD103)   | NS              | NS              | NS         |
|                          | Ocln            | NS              | NS              | NS         |
|                          | S1pr2           | NS              | -               | -          |
|                          | Sell (CD62L)    | +               | NS              | +          |
|                          | Selplg (Psgl1)  | +               | +               | +          |
| Chemokine receptors      | Ccr5            | +               | NS              | +          |
|                          | Ccr7            | -               | +               | +          |
|                          | Cxcr3           | NS              | +               | +          |
|                          | Cxcr4           | NS              | -               | -          |
|                          | Cxcr5           | -               | -               | --         |
| Co-stimulatory molecules | Cd28            | NS              | NS              | NS         |
|                          | Cd40lg          | -               | NS              | -          |
|                          | Icos            | +               | +               | +          |
|                          | Klrk1 (NKG2D)   | NS              | NS              | NS         |
|                          | Sh2d1a (SAP)    | NS              | -               | -          |
|                          | Tnfrsf4 (Ox40)  | NS              | ++              | ++         |
|                          | Tnfrsf18 (GITR) | +               | +               | +          |
| Tnfsf4 (Ox40L)           | NS              | NS              | NS              |            |
| Co-inhibitory molecules  | Ctla4           | ++              | NS              | ++         |
|                          | Fasl            | NS              | NS              | NS         |
|                          | Havcr2 (TIM-3)  | +               | NS              | +          |
|                          | Lag3            | +               | +               | ++         |
|                          | Pdcd1 (PD-1)    | -               | --              | --         |
|                          | Tigit           | NS              | NS              | NS         |
| Cytokines                | Ebi3 (IL27b)    | NS              | NS              | NS         |
|                          | Ifng            | NS              | +               | +          |
|                          | Il10            | ++              | NS              | ++         |
|                          | Il21            | NS              | +               | +          |
|                          | Il4             | NS              | -               | -          |
|                          | Il5             | NS              | NS              | NS         |
|                          | Mcub (Areg)     | NS              | NS              | NS         |
|                          | Tgfb1           | NS              | +               | NS         |
| Cytokine receptors       | Il10ra          | NS              | NS              | NS         |
|                          | Il12rb2         | NS              | NS              | NS         |
|                          | Il21r           | NS              | NS              | NS         |
|                          | Il27ra          | NS              | NS              | NS         |
|                          | IL7r (CD127)    | NS              | NS              | NS         |
|                          | IL17rc          | NS              | NS              | NS         |
|                          | Il2ra (CD25)    | NS              | NS              | +          |
|                          | Tgfbr1          | NS              | NS              | NS         |
|                          | Tgfbr2          | NS              | -               | -          |
|                          | Tgfbr3          | NS              | NS              | NS         |
|                          | Atf6            | NS              | NS              | NS         |
|                          | Ahr             | +               | +               | +          |
|                          | Ajuba           | NS              | NS              | NS         |
|                          | Ascl2           | NS              | -               | -          |
|                          | Bach2           | NS              | NS              | NS         |
|                          | Batf            | NS              | +               | NS         |
|                          | Bcl6            | -               | -               | --         |
|                          | Bhlhe40         | -               | +               | NS         |
|                          | Bmyc            | -               | NS              | NS         |
|                          | Cbfa2t3         | NS              | -               | -          |



|                       |                       |    |    |    |
|-----------------------|-----------------------|----|----|----|
| Transcription factors | Cebpa                 | NS | -  | -  |
|                       | Dbp                   | NS | NS | NS |
|                       | E2f1                  | NS | NS | NS |
|                       | Egr2                  | NS | NS | NS |
|                       | Elk4                  | -  | NS | -  |
|                       | Eomes                 | NS | NS | NS |
|                       | FoxP1                 | NS | +  | +  |
|                       | FoxP3                 | NS | NS | NS |
|                       | Grhl1                 | NS | NS | NS |
|                       | Hmgb2                 | NS | NS | NS |
|                       | Id2                   | NS | +  | +  |
|                       | Id3                   | -  | -  | -- |
|                       | Irf1                  | NS | +  | +  |
|                       | Irf4                  | NS | +  | +  |
|                       | Jdp2                  | NS | NS | NS |
|                       | Klf2                  | -  | ++ | +  |
|                       | Lef1                  | NS | -  | -  |
|                       | Lilrb4a               | NS | NS | NS |
|                       | Maf                   | +  | -  | +  |
|                       | Myb                   | NS | NS | NS |
|                       | Mybl2                 | NS | NS | NS |
|                       | Myc                   | NS | NS | NS |
|                       | Nfia                  | NS | -  | -  |
|                       | Nfil3                 | NS | NS | NS |
|                       | Nr1h3 (LXR $\alpha$ ) | NS | NS | NS |
|                       | Pax5                  | NS | NS | NS |
|                       | Pax9                  | NS | NS | NS |
|                       | Pou2af1 (OcaB)        | NS | -  | -  |
|                       | Prdm1 (Blimp-1)       | ++ | NS | ++ |
|                       | Rbpj                  | NS | +  | NS |
|                       | Runx2                 | NS | +  | +  |
|                       | Rora                  | NS | NS | NS |
|                       | S1pr1                 | NS | +  | NS |
|                       | Six5                  | NS | NS | NS |
|                       | Sox4                  | NS | NS | NS |
|                       | Sox8                  | NS | NS | NS |
|                       | Stat1                 | -  | +  | NS |
|                       | Stat3                 | NS | NS | NS |
|                       | Stat4                 | -  | NS | -  |
|                       | Tbx21 (T-bet)         | NS | NS | NS |
| Tcf7                  | --                    | -  | -- |    |
| Tox2                  | -                     | -  | -- |    |
| Vdr                   | NS                    | NS | NS |    |
| Zbtb16 (PLZF)         | NS                    | NS | NS |    |
| Secretion proteins    | Chgb                  | NS | NS | NS |
|                       | Gzmb (Granzyme B)     | NS | NS | NS |
| Enzymes               | Cblb                  | NS | NS | NS |
|                       | Entpd1 (CD39)         | NS | NS | +  |
|                       | Itk                   | NS | -  | -  |
|                       | Nt5e (CD73)           | NS | NS | NS |
|                       | Serpinb6b             | NS | NS | NS |
| Serpinb9              | NS                    | NS | NS |    |

+++ FC>4  
 ++ 4>FC>2  
 + 2>FC>1  
 NS 1>FC>-1  
 - -1>FC>-2  
 - - -2>FC>-4  
 - - - FC<-4


  
 Upregulated  
 Downregulated  
 NS Non-significant

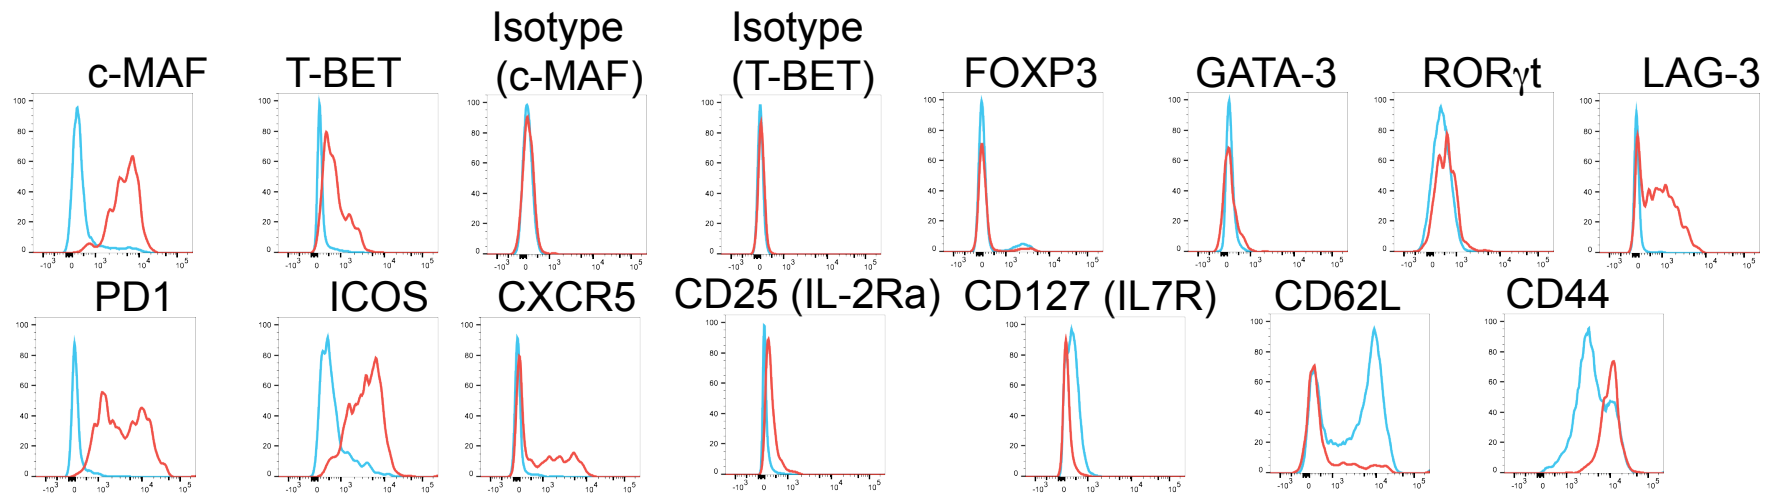

**Supplementary Figure 1. Representative flow cytometry staining profiles of splenocytes from BDC2.5mi/IA<sup>g7</sup>-NP-treated NOD mice (n=3 each from 3 experiments).** The histogram overlays correspond to levels of expression of the different markers in the Tet<sup>+</sup> (red) vs. Tet<sup>-</sup> (blue) CD4<sup>+</sup>B220<sup>-</sup> subsets.

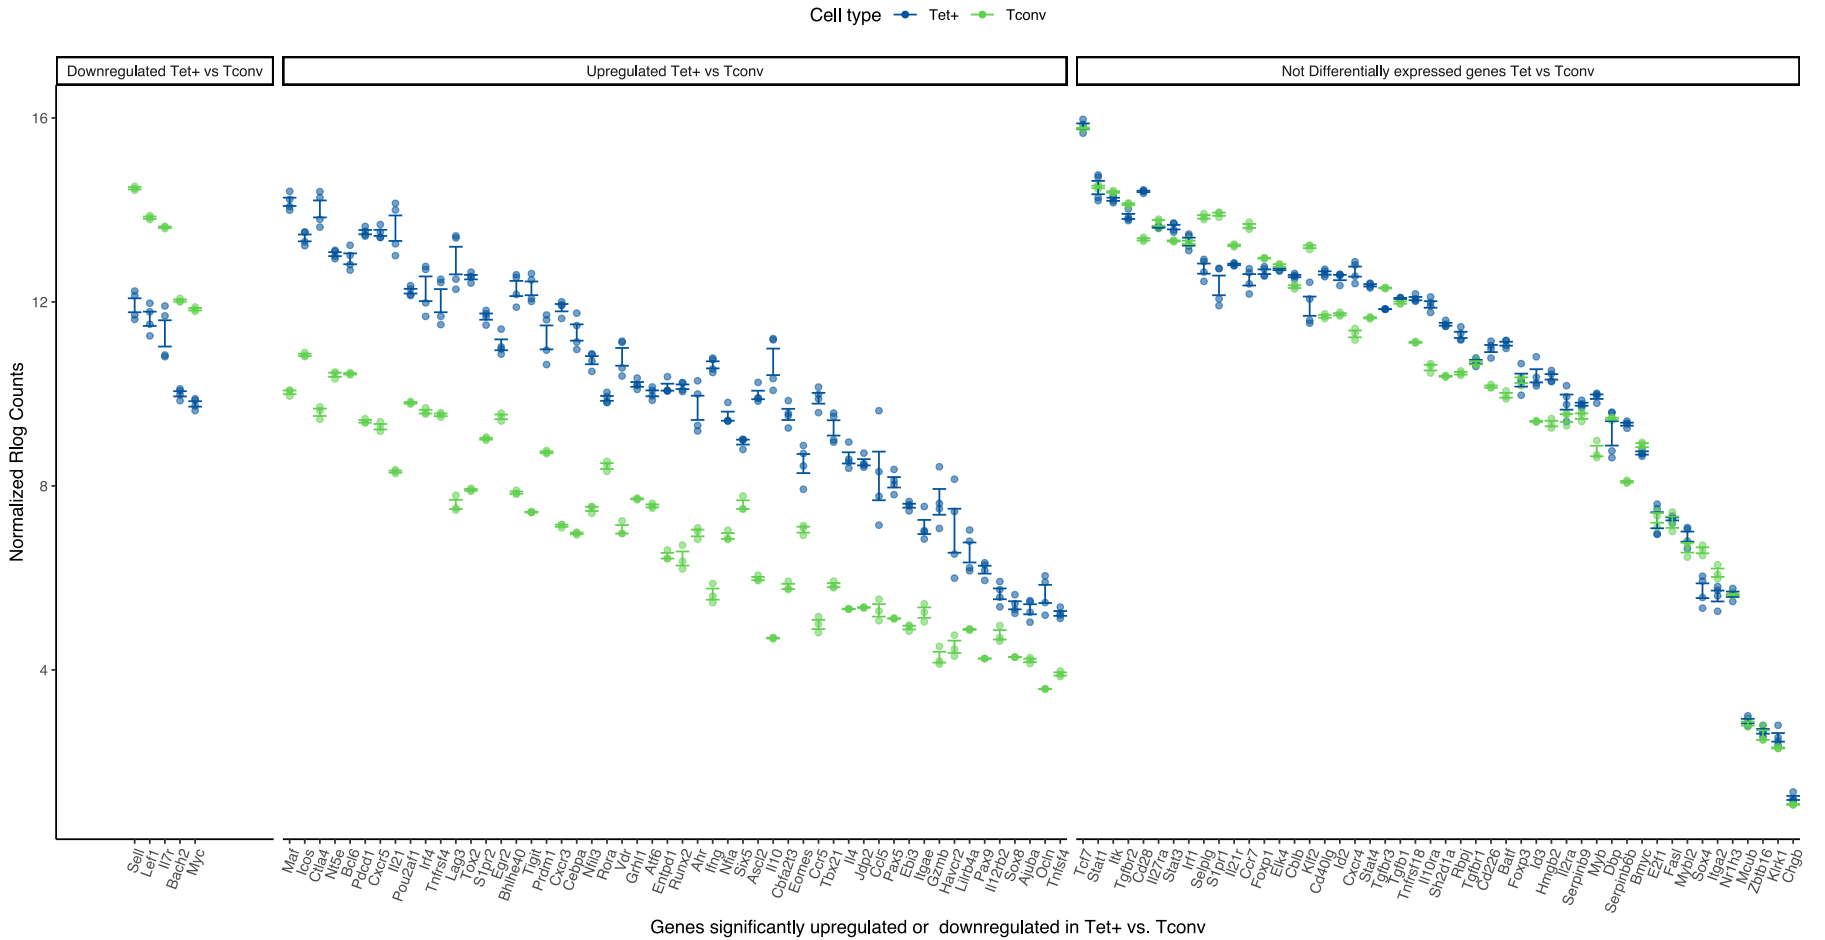

**Supplementary Figure 2. Normalized counts for 106 TR1/TFH/Treg-relevant genes in pMHCII-NP-induced TR1-like vs. Tconv CD4+ T-cells.** Histogram of rlog normalized counts (normalization by counts per million (CPM)) of the 106 gene selection from **Supplementary Table 1** for BDC2.5mi/IA<sup>g7</sup> Tet+ and Tconv subsets from the samples in **main Fig. 1A**. In blue, counts in Tet+ cells; in green, counts in Tconv cells. Genes are divided according to whether they are significantly upregulated or downregulated (or not differentially expressed) in Tet+ vs. Tconv cells ( $FC \geq 4$  or  $FC \leq -4$ , respectively, and  $FDR \leq 0.01$ ). Genes with  $< 10$  total counts (for all three replicates) are not plotted. Data correspond to the average  $\pm$  SEM from 3 samples/cell type, from 1 experiment.

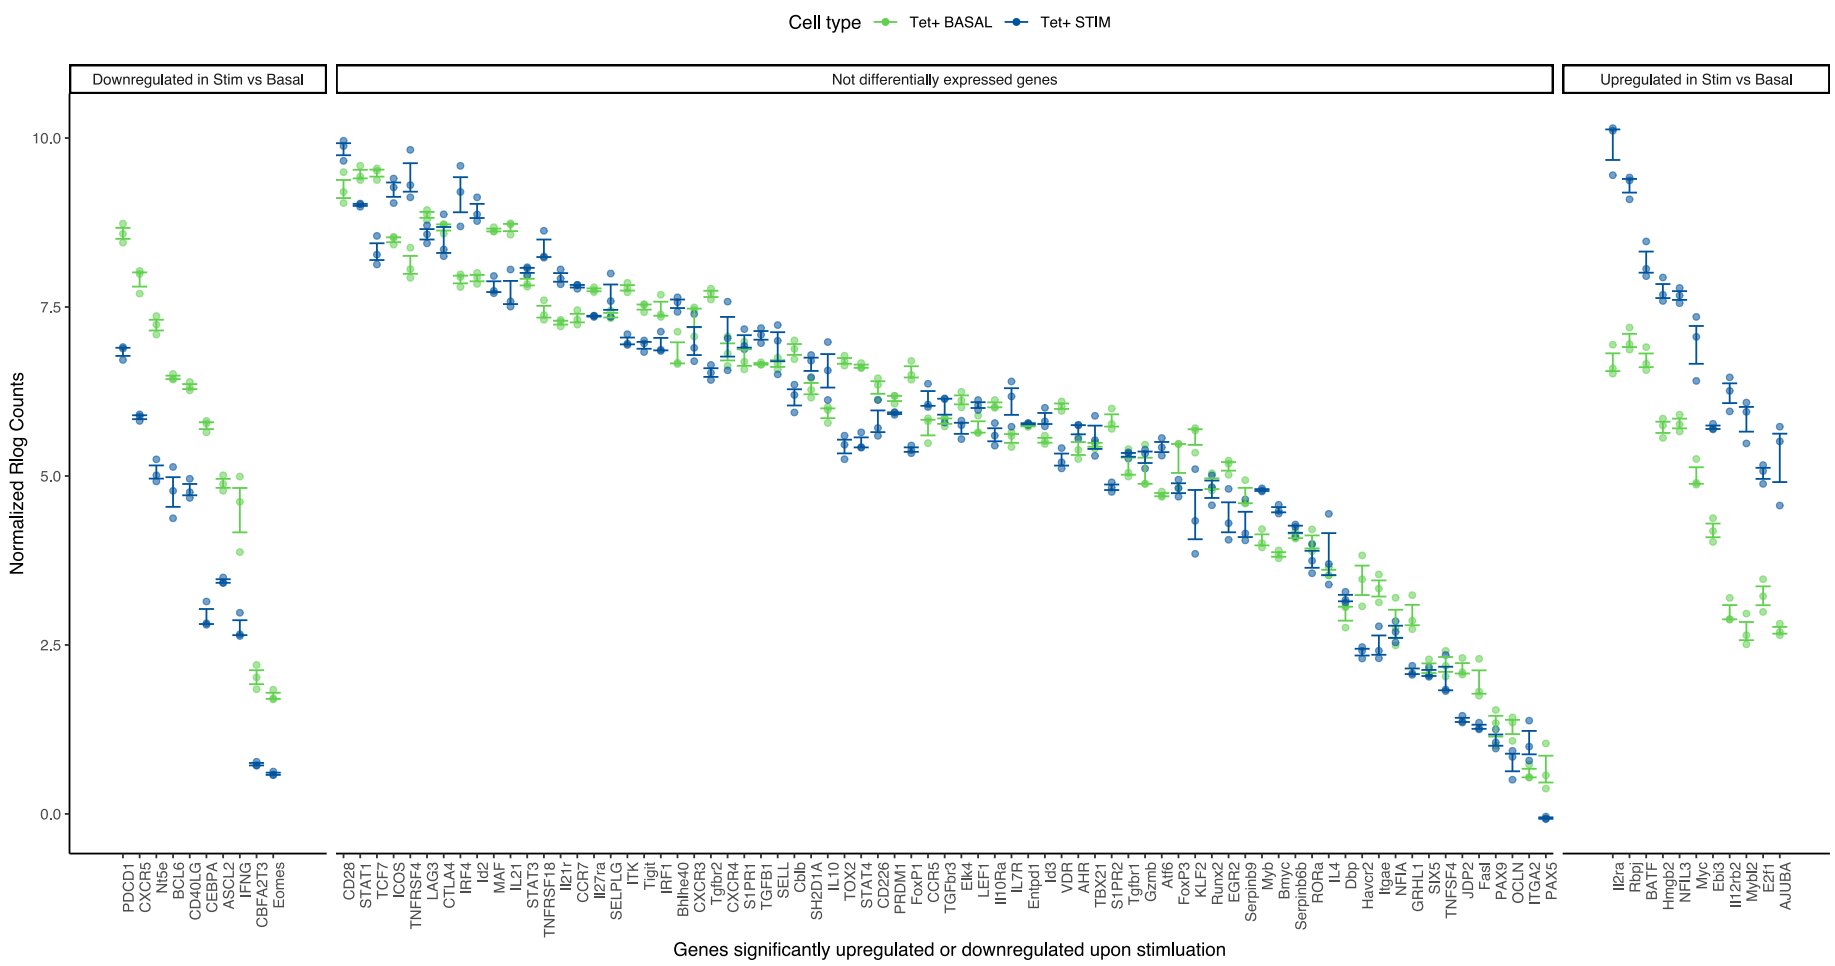

**Supplementary Figure 3. Changes in gene expression in pMHCII-NP-induced Tet+ cells upon stimulation *ex vivo*.** Histogram of rlog normalized counts (CPM) of the 106 gene selection from **Supplementary Table 1** in basal and stimulated conditions from the Tet+ samples from main **Fig. 1A** (n=3/condition). In green and blue, counts in BDC2.5mi/IA<sup>97</sup> Tet+ cells in basal and stimulated conditions, respectively. Genes are divided according to whether they are significantly upregulated or downregulated (or not differentially expressed) upon stimulation ( $FC \geq 4$  or  $FC \leq -4$ , respectively, and  $FDR \leq 0.01$ ). Genes with <10 total counts (for all three replicates) are not plotted. Data correspond to the average  $\pm$  SEM from 3 samples/condition, from 1 experiment.

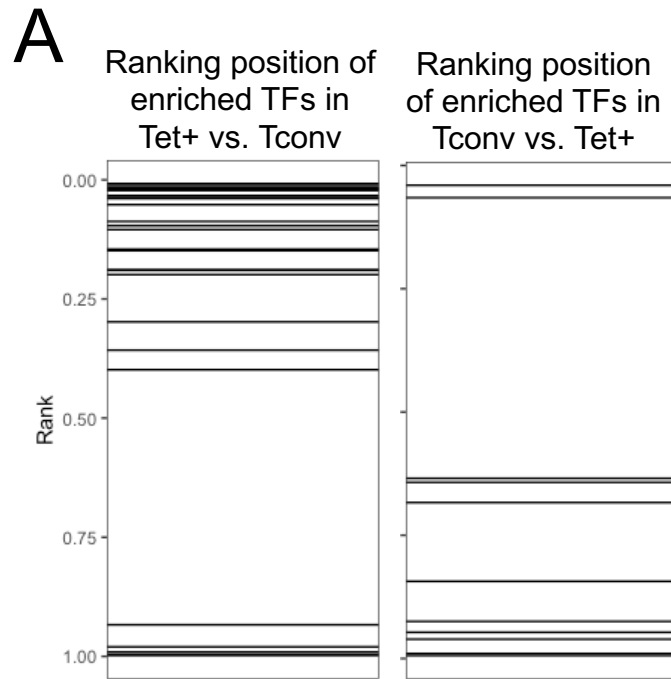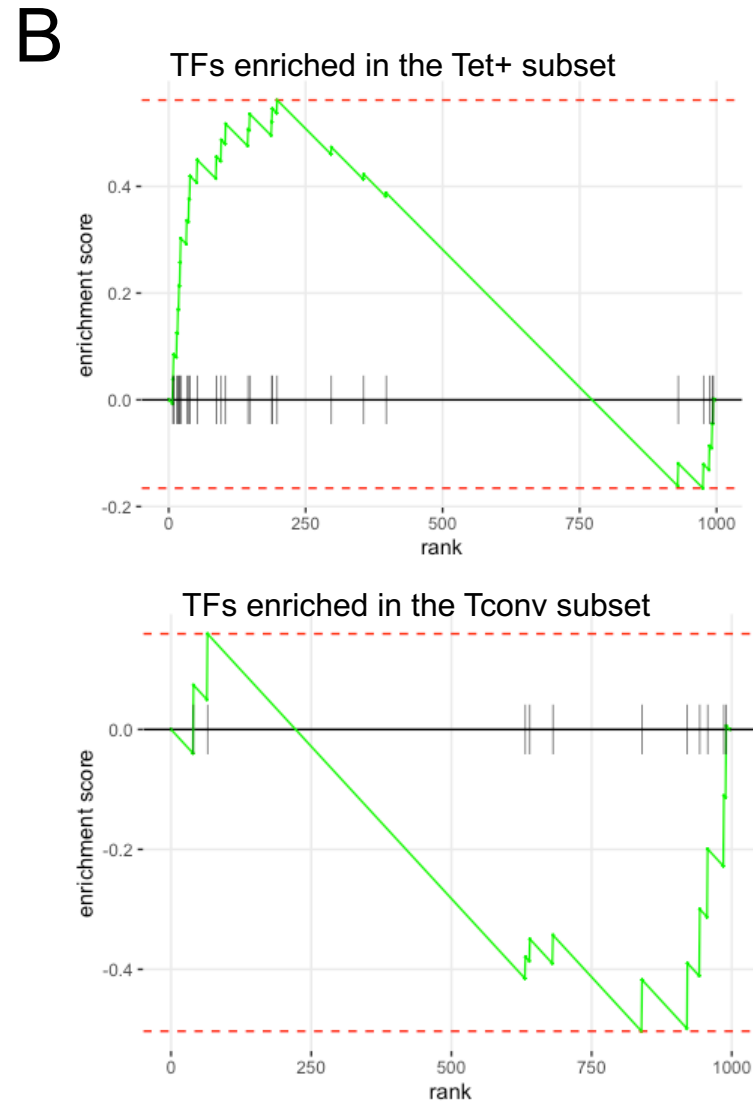



**Supplementary Figure 4. Transcription factor upregulation vs. gene expression.** **A**, Validation transcription factors from **Supplementary Table 1** represented over a relative rank (from 0 to 1) of activity obtained from VIPER based on ARACNe regulon. More active transcription factors in BDC2.5mi/IA<sup>g7</sup> Tet<sup>+</sup> cells appear at the top of the list, while less active appear at the bottom. Left shows transcription factors that are described to be active and right, those that are expected to be inactive/less active in the Tet<sup>+</sup> subset. **B**, Pre-ranked GSEA of transcription factors expected to be active (left) or inactive (right) in the BDC2.5mi/IA<sup>g7</sup> Tet<sup>+</sup> subset.

A

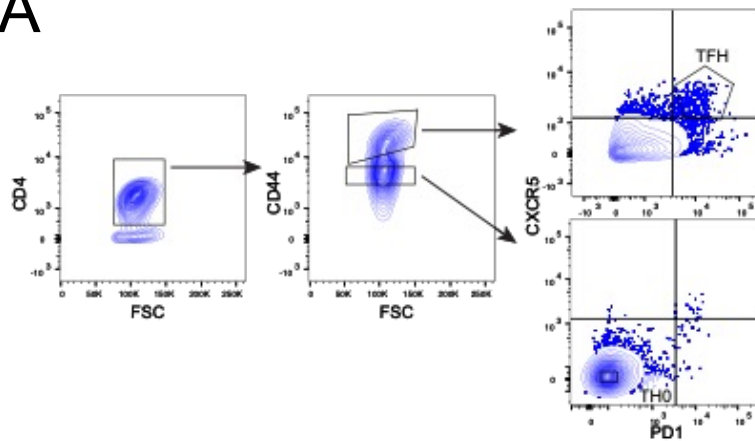

B

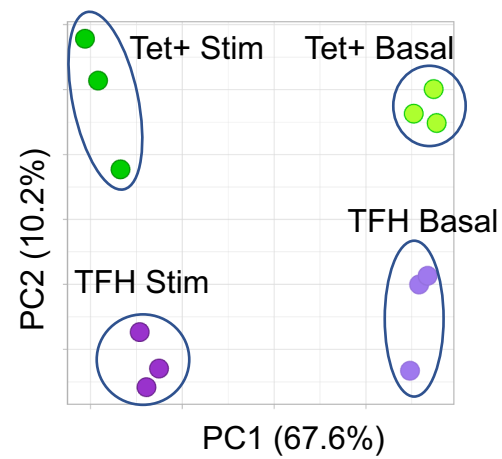

C

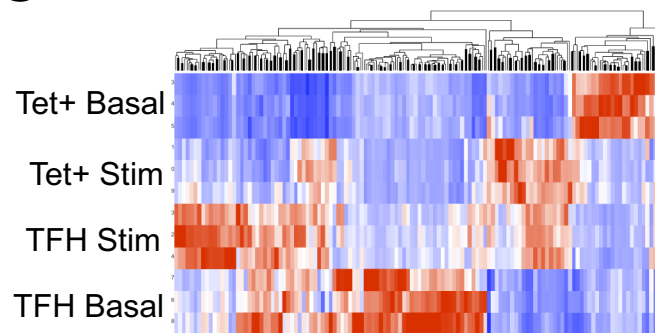

**Supplementary Figure 5. pMHCII-NP-induced Tet<sup>+</sup> cells vs. TFH cells.** **A**, Gating strategy for TFH cell sorting for RNAseq. Three KLH-immunized NOD mice were processed in 2 batches (1 and 2 mice each, respectively) to obtain 3 samples of TFH cells (CD4<sup>+</sup>CD44<sup>hi</sup>CXCR5<sup>hi</sup>PD1<sup>hi</sup>) and Tconv cells (CD4<sup>+</sup>CD44<sup>-</sup>CXCR5<sup>-</sup>PD1<sup>-</sup>). **B**, PCA plot comparing basal and stimulated BDC2.5mi/IA<sup>97</sup> Tet<sup>+</sup> and TF cells (light green and light purple vs. dark green and dark purple, respectively) (n=3 samples per cell type, from 1 experiment). **C**, Heatmap comparing differentially-expressed genes ( $|FC| \geq 4$  and  $FDR \leq 0.01$ ) for all 4 populations from **B**. In red, upregulated genes for the corresponding population; in blue, downregulated genes.

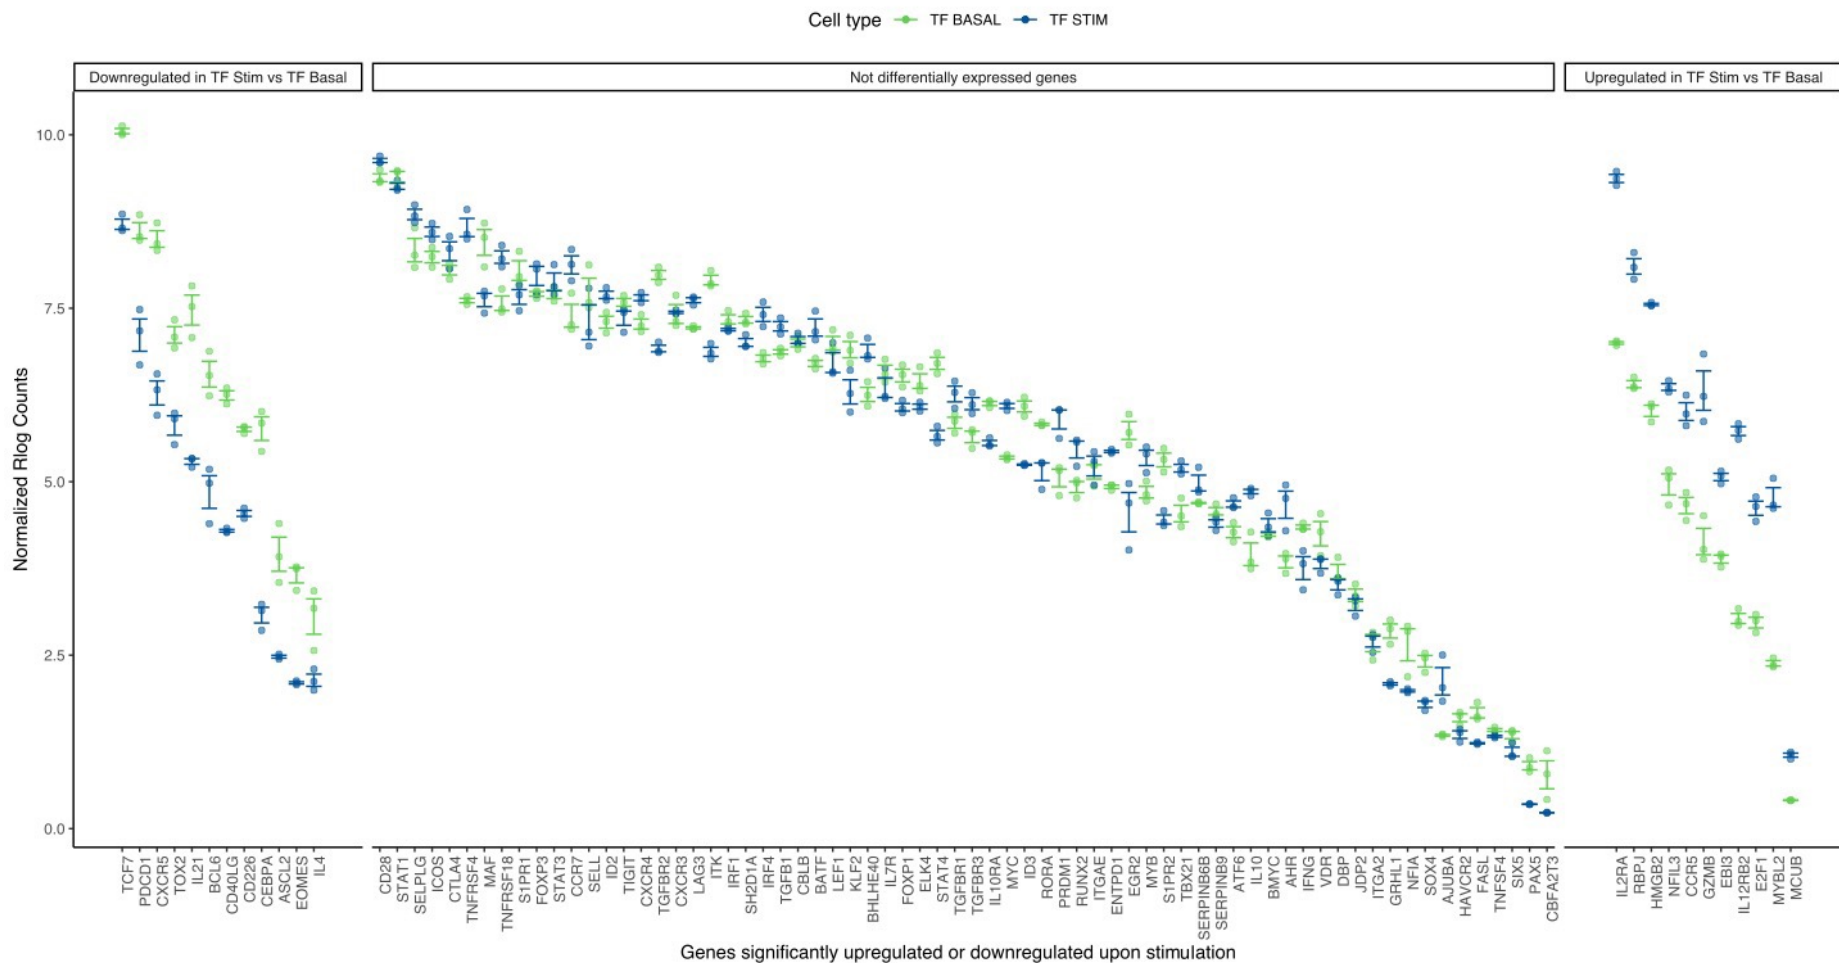

**Supplementary Figure 6. Changes in gene expression in endogenous TFH cells upon stimulation *ex vivo*.** Histogram of rlog normalized counts (CPM) of the 106 gene selection from **Supplementary Table 1** in TFH cells before and after stimulation *ex vivo* with anti-CD3/anti-CD28 mAb-coated beads (n=3/condition). In green and blue, counts in TFH cells in basal and stimulated conditions, respectively. Genes are divided according to whether they are significantly upregulated or downregulated (or not differentially expressed) upon stimulation ( $FC \geq 4$  or  $FC \leq -4$ , respectively, and  $FDR \leq 0.01$ ). Genes with <10 total counts (for all three replicates) are not plotted. Data correspond to the average  $\pm$  SEM from 3 samples/condition from 1 experiment.

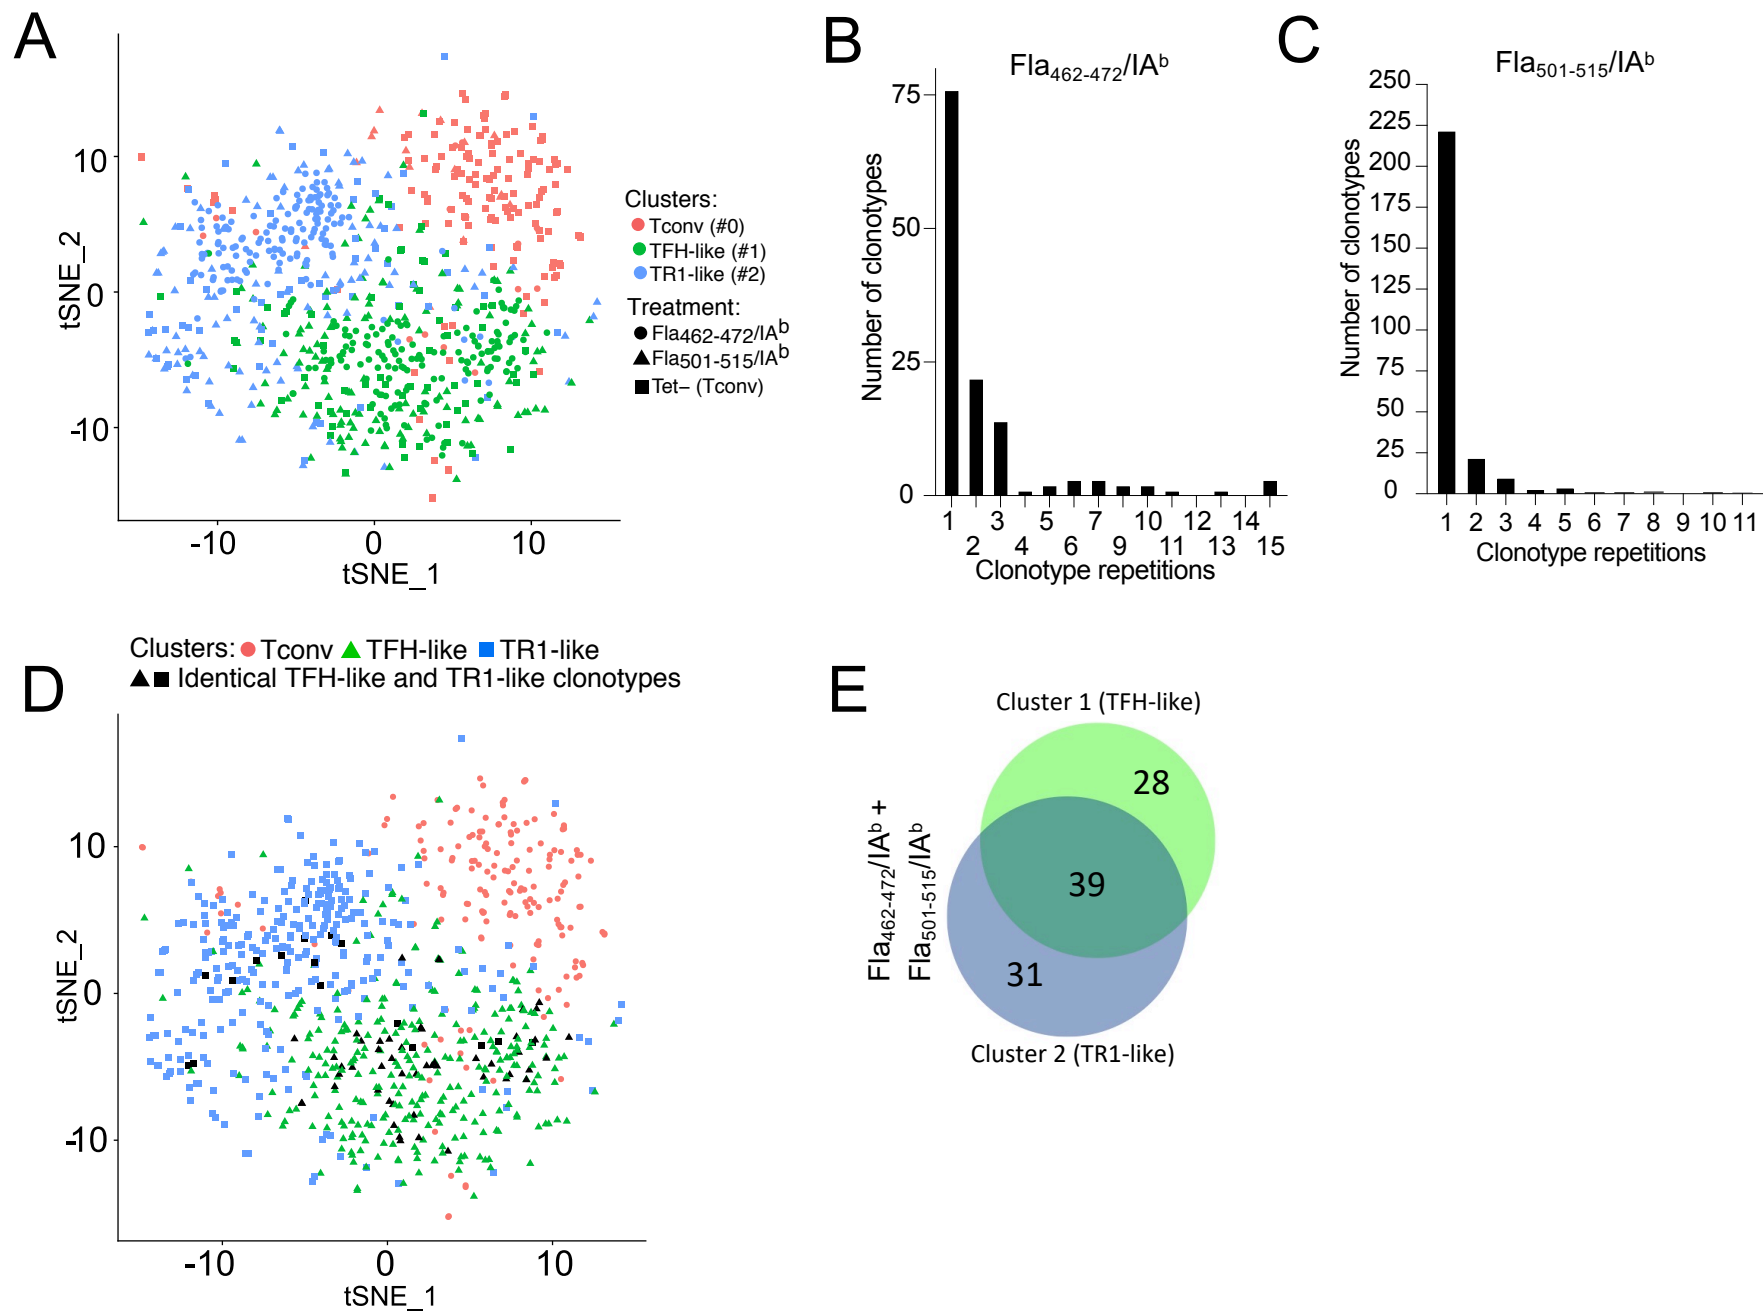

**Supplementary Figure 7. pMHCII-NP-induced TR1-like cells are transcriptionally homogeneous but oligoclonal and co-exist with a Tet<sup>+</sup> TFH-like subpopulation that contains identical clonotypes.** **A**, Seurat clustering analysis of the Tet<sup>+</sup> pools from Fla<sub>462-472</sub>/IA<sup>b</sup>- and Fla<sub>501-515</sub>/IA<sup>b</sup>-NP-treated C57BL/6 mice (n=6 and 5 mice, respectively, from 2 experiments). Data correspond to Smartseq2-based scRNAseq data for sorted Tet<sup>+</sup> and Tet<sup>-</sup> cells. **B-C**, Distribution of unique TCR sequences in the Tet<sup>+</sup> pools arising in response to treatment with Fla<sub>462-472</sub>/IA<sup>b</sup>- or Fla<sub>501-515</sub>/IA<sup>b</sup>-NPs in C57BL/6 mice, respectively, from 1 experiment each. The histogram plot shows the distribution of the different TCRαβ clonotypes identified vs. the number of cells (clones) expressing each TCRαβ pair. **D**, tSNE plot from **A** showing the cluster location for TCRαβ pairs expressed by more than one cell. Data correspond to Fla<sub>462-472</sub>/IA<sup>b</sup>- or Fla<sub>501-515</sub>/IA<sup>b</sup>-NP-treated C57BL/6 mice. **E**, Venn diagram from **D** showing the distribution of repeated TCRαβ pairs in clusters 1 vs. 2. Most (39/67) of the clonotypes found in the TFH-like cluster (#1) were also found in the TR1-like cluster (#2) (39/70).

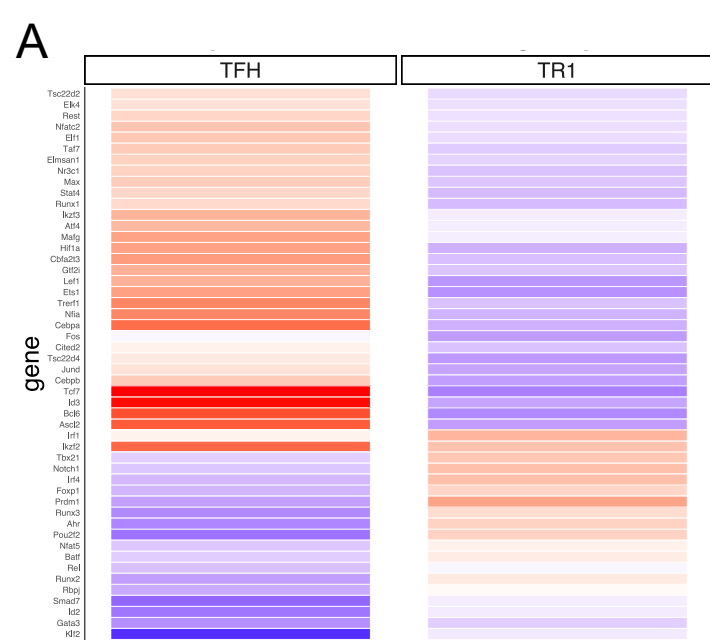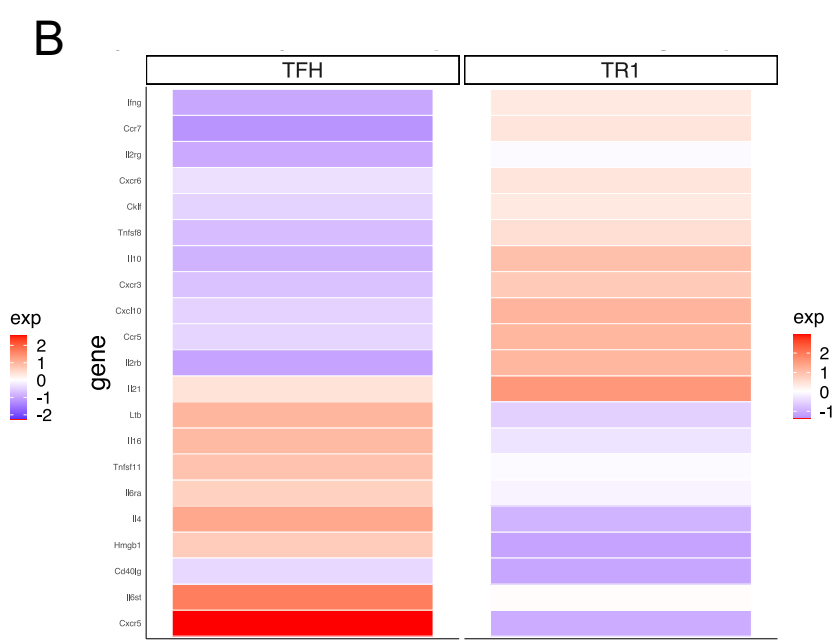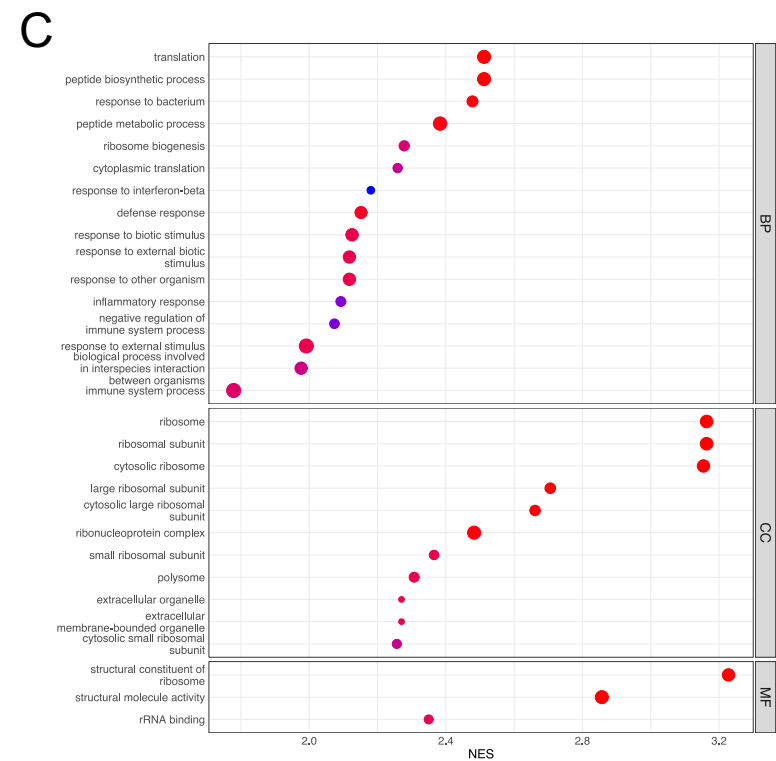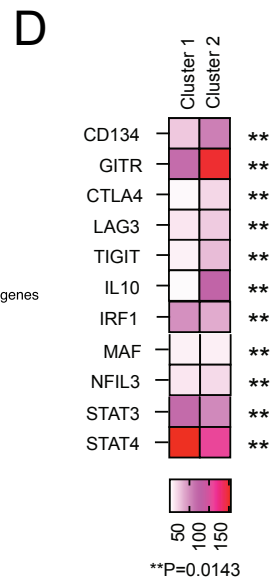



**Supplementary Figure 8. Differential expression of transcription factor, cytokines/chemokine and cytokine/chemokine receptor genes, and gene ontology pathways between the Tet<sup>+</sup> TFH-like and Tet<sup>+</sup> TR1-like/TR1 clusters.** **A-B**, Heatmaps showing scaled average gene expression for differentially expressed ( $|FC| > 2$  and  $FDR < 0.05$ ) transcription factor (GO:0003700) (**A**) and cytokine/chemokine and cytokine/chemokine receptor genes (GO:0005125, GO:0004896, GO:0019956) (**B**) in the TFH- and TR1-like/TR1 cell sub-clusters found within the BDC2.5/IAg7-NP-induced tetramer+ cell pool. Data were obtained from 10x genomics-based scRNAseq data for sorted Tet<sup>+</sup> and Tet<sup>-</sup> cells from NOD mice treated with BDC2.5mi/IA<sup>g7</sup>-NP (from n=5 mice, from 1 experiment). **C**, Dot plot showing the differentially enriched gene ontology (GO) pathways (adjusted P value < 0.05) for differentially expressed genes ( $|FC| > 2$  and  $FDR < 0.05$ ) between the TFH- and TR1-like/TR1 sub-clusters from **A-B**. Pathways are ordered based on the normalized enrichment score. Color represents the value of the adjusted P value. Dot size represents the number of genes found for each pathway. Pathways are classified based on their ontology: BP: Biological process; CC: Cellular Components; and MF: Molecular function. **D**, Most differentially expressed markers ( $P < 0.02$ ) between the TFH- and TR1-like/TR1 cell sub-clusters (#1 and #2, respectively), as determined via mass cytometry (n=4 mice, from 1 experiment).

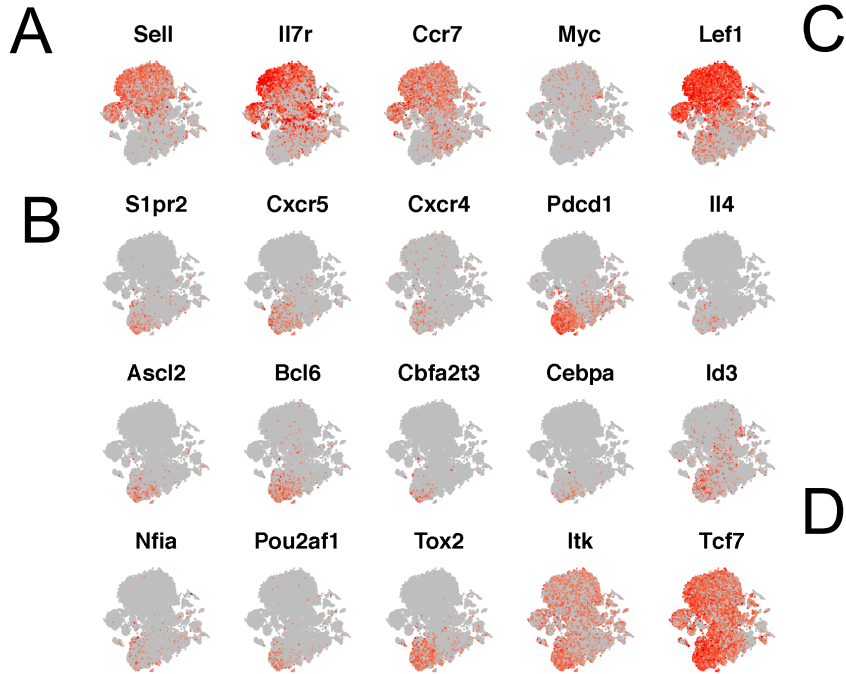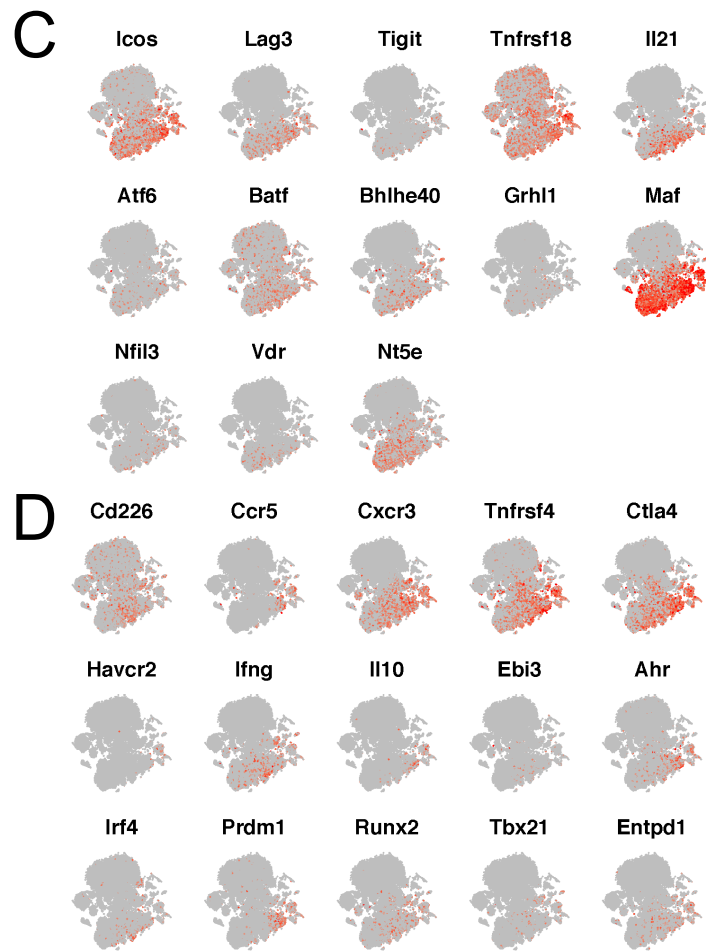

**Supplementary Figure 9. Differences in gene expression for representative genes in the cell clusters identified via 10x genomics scRNAseq. A**, enriched in Tconv cells from main **Fig. 3. B**, enriched in the BDC2.5mi/IA<sup>g7</sup>/InsB<sub>9-23</sub>/IA<sup>g7</sup> Tet+ TFH-like sub-cluster from **Fig. 3. C**, shared between the Tet+ TFH- and Tet+ TR1-like sub-clusters from **Fig. 3. D**, enriched in the Tet+ TR1-like sub-cluster from **Fig. 3**.

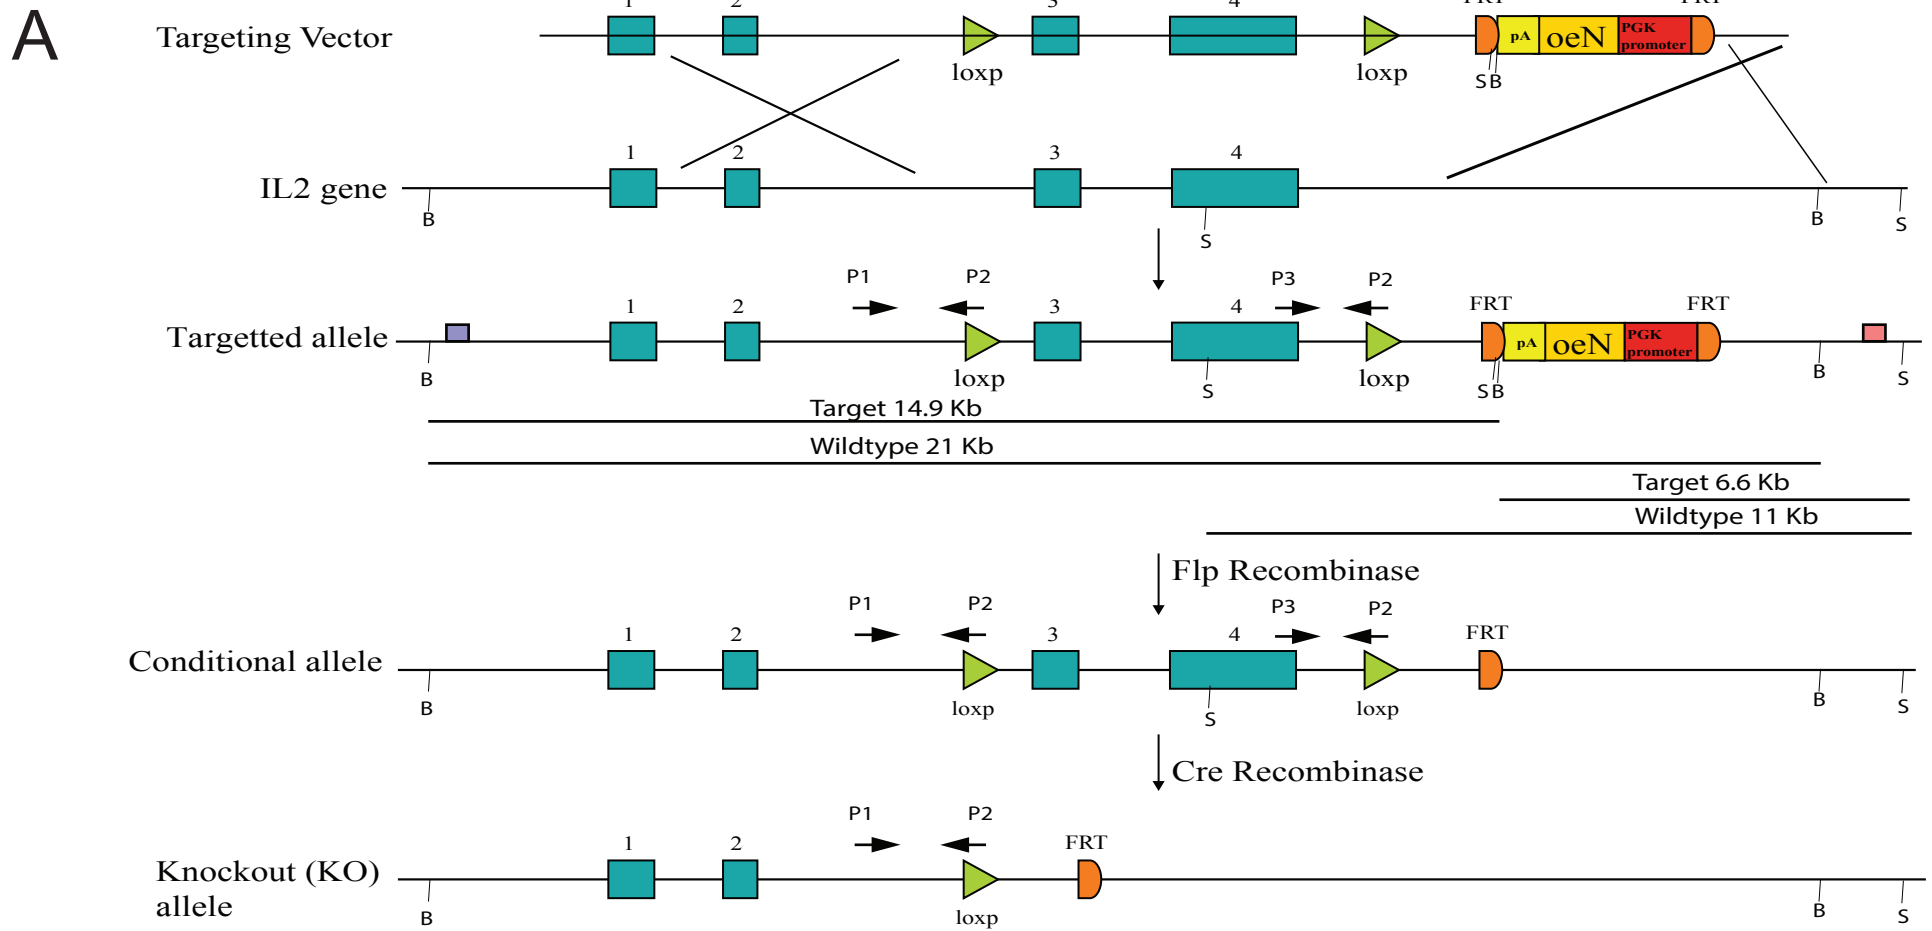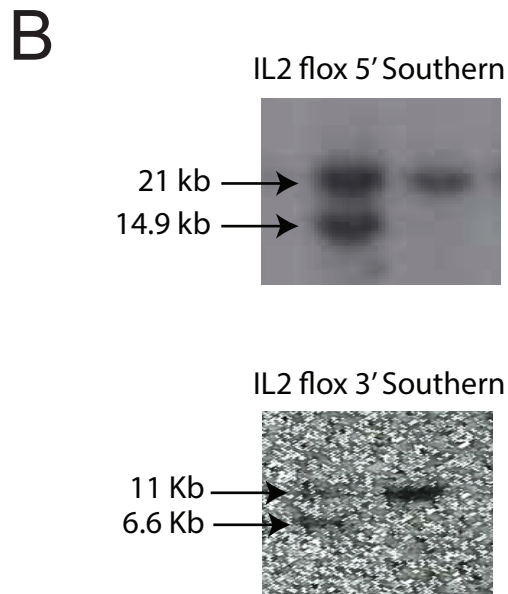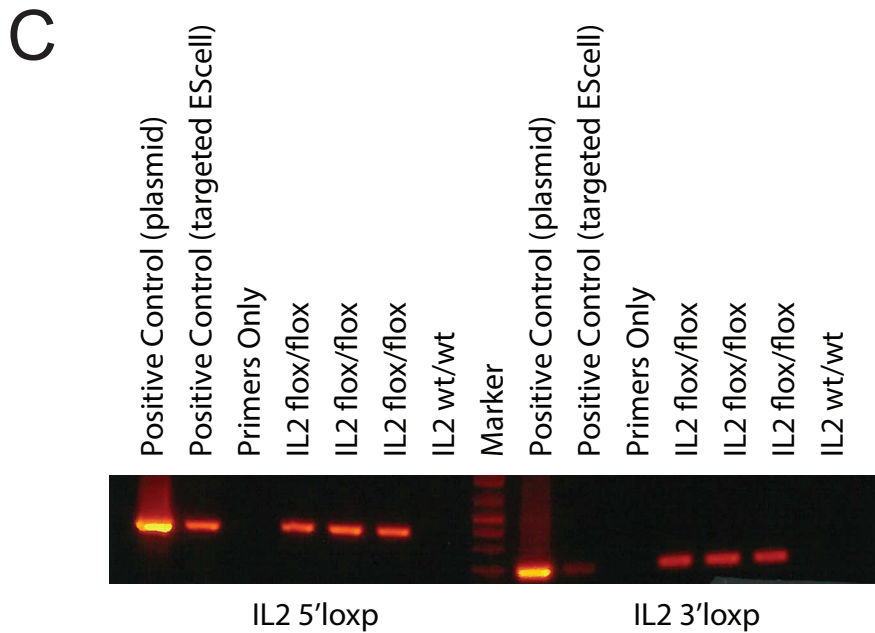

**Supplementary Figure 10. Production of a conditional gene-targeted NOD.*Ii2*<sup>loxP</sup> strain. A,** Targeting strategy in embryonic stem cells and location of primers and probes for genotyping. **B-C,** Southern blotting (**B**) and PCR (**C**) documenting the presence of the loxP sites downstream of exon 3 and upstream of exon 4 of *Ii2*.

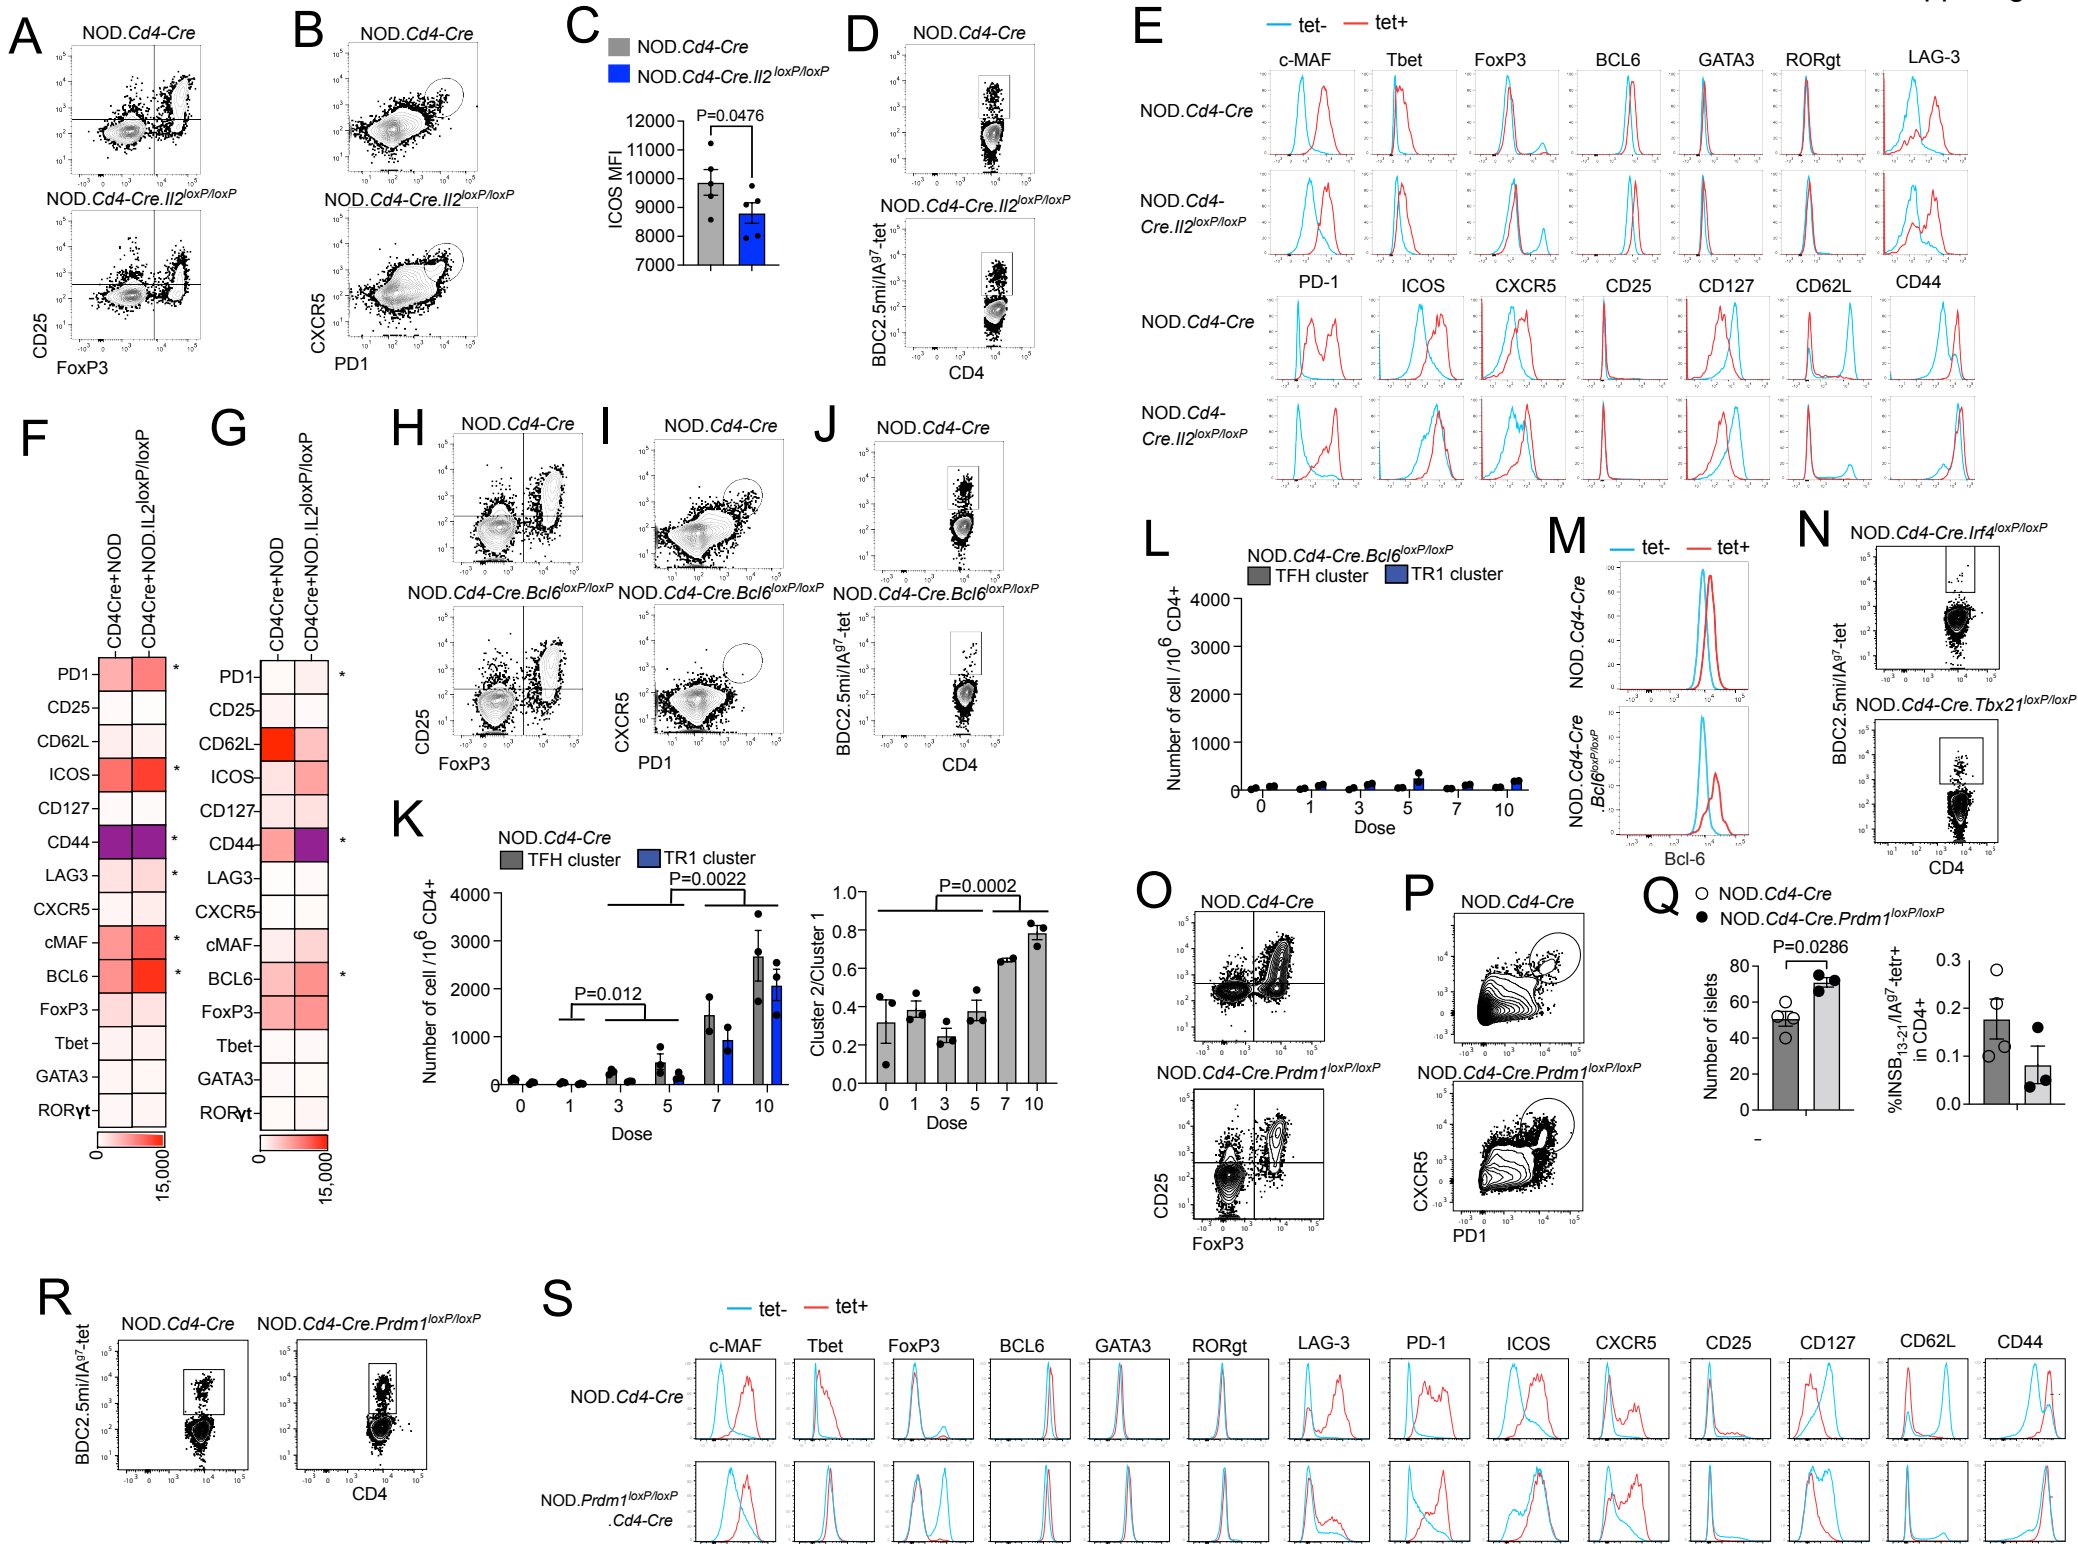

**Supplementary Figure 11. Representative flow cytometry profiles for FoxP3+ Tregs and TFH cells in conditional knockout mice from Figures 4 and 5.** **A**, Representative staining profiles for CD25<sup>+</sup>FoxP3<sup>+</sup> CD4<sup>+</sup> T-cells in NOD.*Cd4-Cre.II2<sup>loxP/loxP</sup>* and NOD.*Cd4-Cre* mice. **B**, Representative staining profiles for endogenous PD-1<sup>high</sup>/CXCR5<sup>high</sup> cells in splenocytes from NOD.*Cd4-Cre.II2<sup>loxP/loxP</sup>* and NOD.*Cd4-Cre* mice. **C**, Mean fluorescence intensity for splenic PD-1<sup>high</sup>/CXCR5<sup>high</sup> cells of NOD.*Cd4-Cre.II2<sup>loxP/loxP</sup>* and NOD.*Cd4-Cre* mice. Data correspond to 5 mice per strain, from 2 experiments. **D**, Representative flow cytometry profiles for BDC2.5mi/IA<sup>g7</sup> Tet<sup>+</sup> CD4<sup>+</sup> T-cells from the spleen of BDC2.5mi/IA<sup>g7</sup>-NP-treated NOD.*Cd4-Cre.II2<sup>loxP/loxP</sup>* and NOD.*Cd4-Cre* mice. **E**, Representative FACS staining profiles for TR1-associated and -non-associated cell markers in the BDC2.5mi/IA<sup>g7</sup> Tet<sup>-</sup> and Tet<sup>+</sup> CD4<sup>+</sup> T-cells of the mice from main Fig. 4 panel **E**. **F and G**, heatmaps comparing the mean fluorescence intensity for the markers from panel **E** in Tet<sup>-</sup> and Tet<sup>+</sup> cells, respectively. **H**, Representative staining profiles for CD25<sup>+</sup>FoxP3<sup>+</sup> CD4<sup>+</sup> T-cells in NOD.*Cd4-Cre.Bcl6<sup>loxP/loxP</sup>* and NOD.*Cd4-Cre* mice. **I**, Representative staining profiles for PD-1<sup>high</sup>/CXCR5<sup>high</sup> (TFH) cells in the spleens of NOD.*Cd4-Cre.Bcl6<sup>loxP/loxP</sup>* and NOD.*Cd4-Cre* mice. **J**, Representative flow cytometry profiles for BDC2.5mi/IA<sup>g7</sup> Tet<sup>+</sup> CD4<sup>+</sup> T-cells from the spleen of BDC2.5mi/IA<sup>g7</sup>-NP-treated NOD.*Cd4-Cre.Bcl6<sup>loxP/loxP</sup>* and NOD.*Cd4-Cre* mice. **K**, Changes in the absolute numbers of BDC2.5mi/IA<sup>g7</sup> Tet<sup>+</sup> TFH- and TR1-like cells (left) or cluster 2 (TR1):cluster 1 (TFH) ratios (right) in NOD.*Cd4-Cre* mice as a function of BDC2.5mi/IA<sup>g7</sup>-NP dose numbers, as measured by mass cytometry. Data correspond to 3 mice per dose number, except the 7-dose group (n=2), from 3 experiments. **L**, Changes in the absolute numbers of BDC2.5mi/IA<sup>g7</sup> Tet<sup>+</sup> TFH- and TR1-like cells in NOD.*Cd4-Cre.Bcl6<sup>loxP/loxP</sup>* mice as a function of BDC2.5mi/IA<sup>g7</sup>-NP dose numbers. Data correspond to 2 mice per dose number, from 3 experiments. **M**, Representative BCL-6 staining profile for Tet<sup>+</sup> vs. Tet<sup>-</sup> cells of BDC2.5mi/IA<sup>g7</sup>-NP-treated NOD.*Cd4-Cre.Bcl6<sup>loxP/loxP</sup>* and NOD.*Cd4-Cre* mice. **N**, Representative flow cytometry profiles for BDC2.5mi/IA<sup>g7</sup> Tet<sup>+</sup> CD4<sup>+</sup> T-cells from the spleen of BDC2.5mi/IA<sup>g7</sup>-NP-treated NOD.*Cd4-Cre.Irf4<sup>loxP/loxP</sup>* and NOD.*Cd4-Cre.Tbx21<sup>loxP/loxP</sup>* mice. **O**, Representative flow cytometry profiles for CD25<sup>+</sup>FoxP3<sup>+</sup> CD4<sup>+</sup> T-cells in NOD.*Cd4-Cre.Prdm1<sup>loxP/loxP</sup>*

and NOD.*Cd4-Cre* mice. **P**, Representative flow cytometry profiles for PD-1<sup>high</sup>/CXCR5<sup>high</sup> (TFH) cells in the spleens of NOD.*Cd4-Cre.Prdm1<sup>loxP/loxP</sup>* and NOD.*Cd4-Cre* mice. **Q**, Left, average number ( $\pm$  SEM) of isolated islets in pancreata from NOD.*Cd4-Cre.Prdm1<sup>loxP/loxP</sup>* and NOD.*Cd4-Cre* mice. Right, average percentage ( $\pm$  SEM) of InsB<sub>13-21</sub>/IA<sup>g7</sup>-specific CD4<sup>+</sup> T-cells in islets from NOD.*Cd4-Cre.Prdm1<sup>loxP/loxP</sup>* and NOD.*Cd4-Cre* mice. Data correspond to n=3 and n=4 mice, respectively. P values were calculated via Mann-Whitney U. **R**, Representative flow cytometry profiles for BDC2.5mi/IA<sup>g7</sup> Tet<sup>+</sup> CD4<sup>+</sup> T-cells from the spleen of BDC2.5mi/IA<sup>g7</sup>-NP-treated NOD.*Cd4-Cre.Prdm1<sup>loxP/loxP</sup>* and NOD.*Cd4-Cre* mice. **S**, Representative flow cytometry profiles for TR1-associated and -non-associated cell markers in the BDC2.5mi/IA<sup>g7</sup> Tet<sup>-</sup> and Tet<sup>+</sup> CD4<sup>+</sup> T-cells of the mice from main Fig. 5 panel **L**.



Up in TR1-like vs TFH

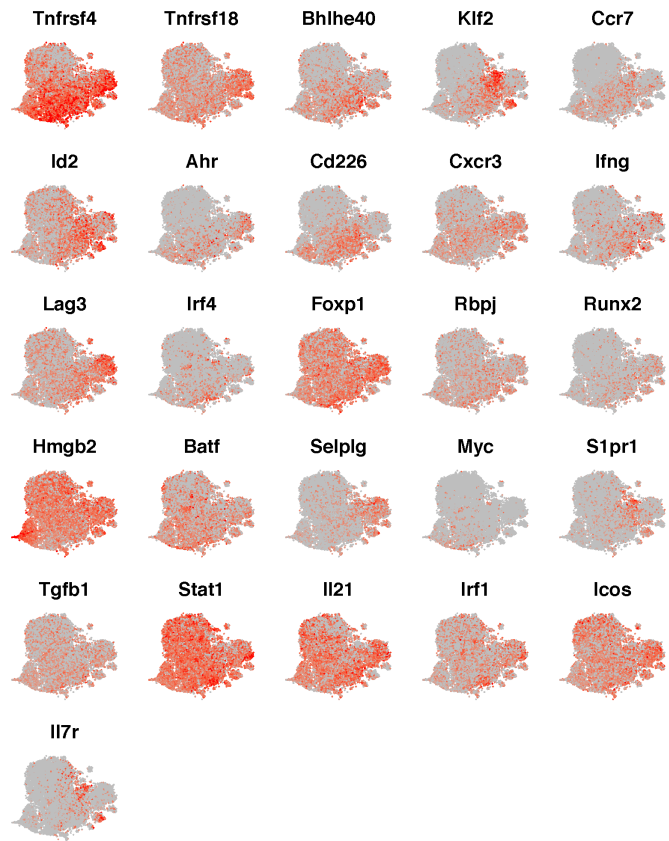

Up in TR1 vs TFH

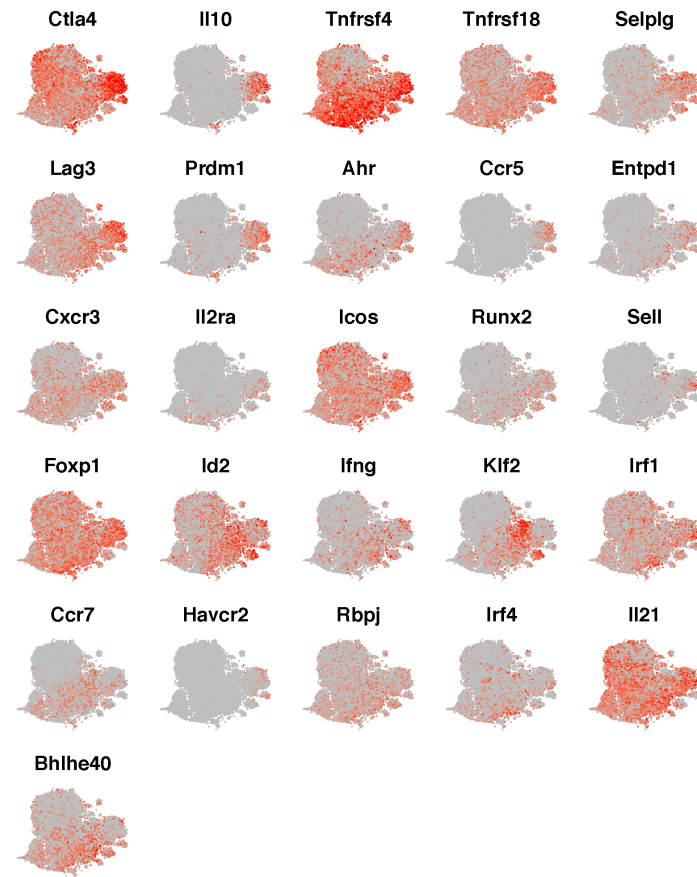

Up in TR1 vs TR1-like

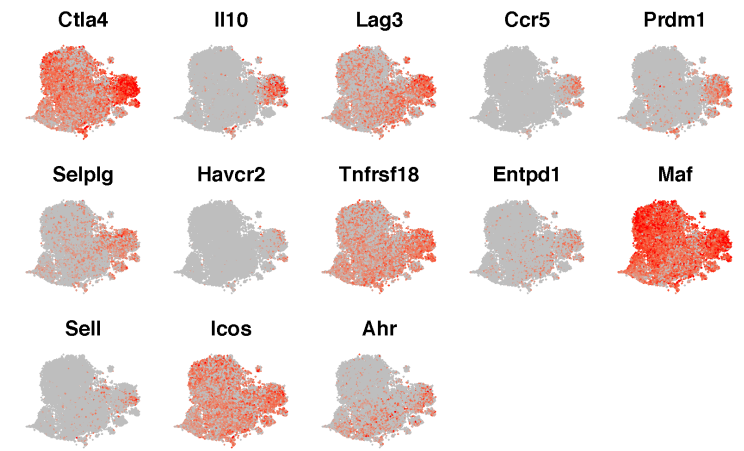

**Supplementary Figure 12. Differences in gene expression for representative genes in Tet+ TFH, transitional TR1-like and terminally differentiated TR1 clusters identified via 10x genomics scRNAseq.** Feature plots correspond to the Tet+ cells isolated from NOD.*Cd4-Cre* and NOD.*Prdm1<sup>loxP/loxP</sup>* mice from main Fig. 6A. Only genes listed in Supplementary Table 1 are shown. **Left**, specifically enriched in Tet+ TR1-like vs. Tet+ TFH. **Middle**, specifically enriched in terminally differentiated Tet+ TR1 vs. Tet+ TFH. **Right**, specifically enriched in terminally differentiated Tet+ TR1 vs. transitional Tet+ TR1-like.

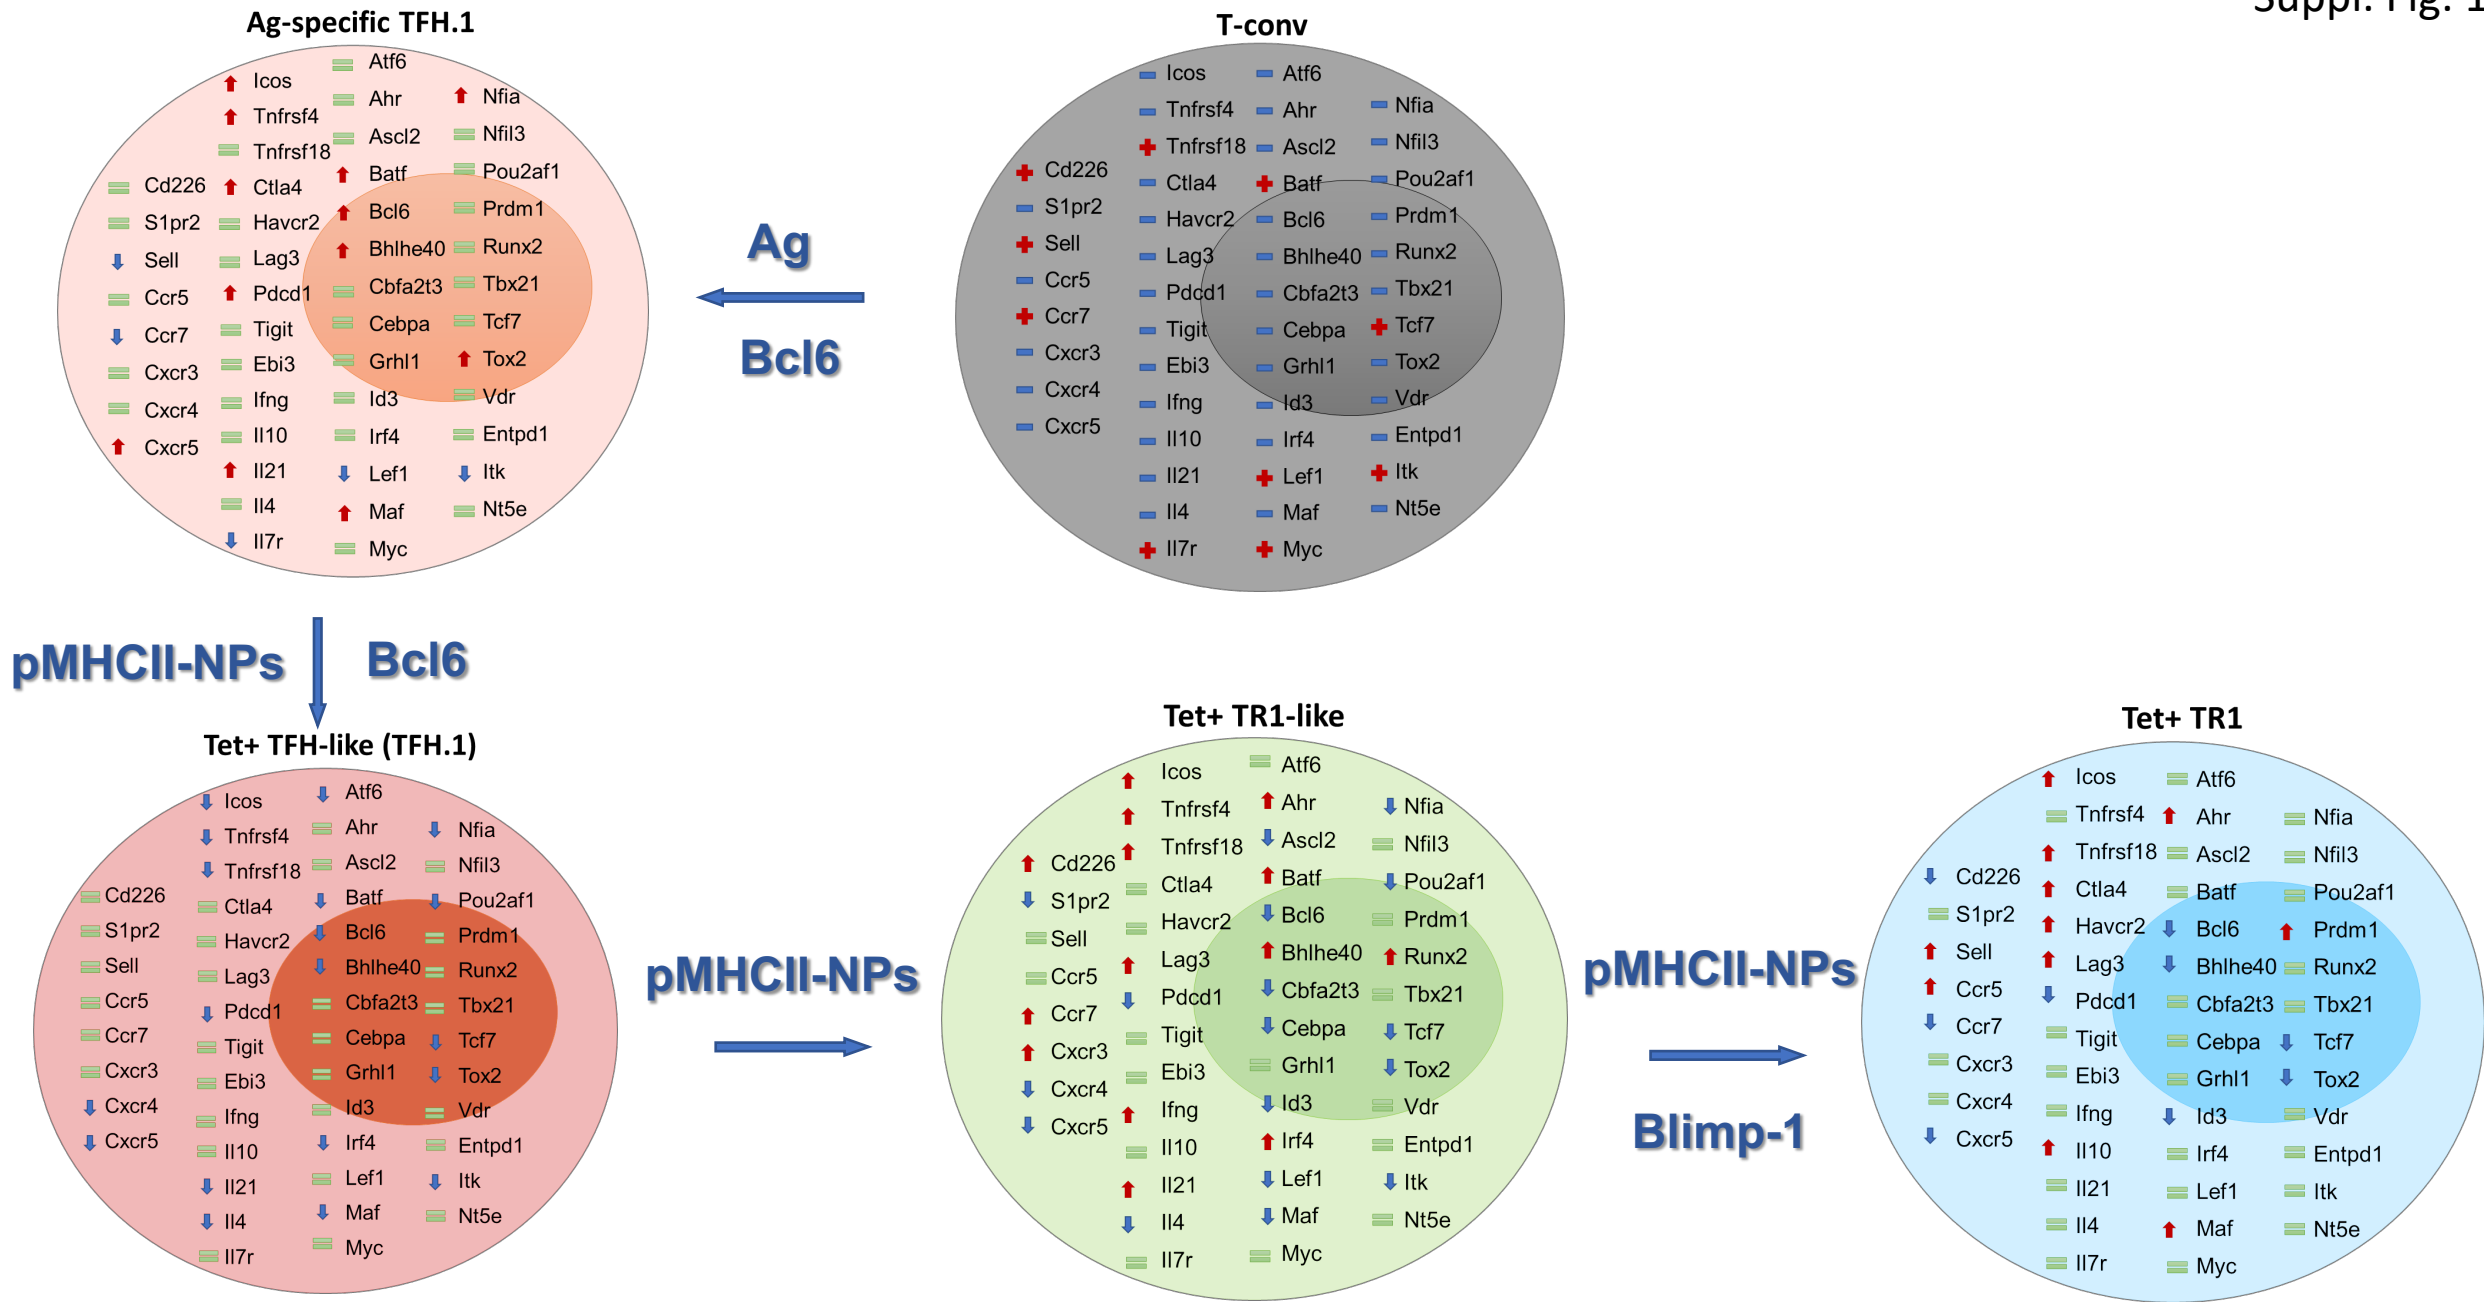

**Supplementary Figure 13. Cartoon summarizing progressive changes in the expression of key Tconv, TFH and TR1 genes from Suppl. Table 1 in the different clusters from main Fig. 8A.** Differential analysis compares each cell type to the hypothetical preceding cell state (Ag-induced TFH.1 vs Tconv, Tet+ TFH-like (TFH.1) vs Ag-induced TFH.1, Tet+ TR1-like vs Tet+ TFH-like (TFH.1), and Tet+ TR1 vs Tet+ TR1-like). T conventional markers were obtained by differential analysis relative to the other cell subsets. Data are consistent with pMHCII-NP-induced conversion of autoantigen-experienced TFH cells into transitional TR1-like and terminally differentiated TR1 cells *in vivo*.

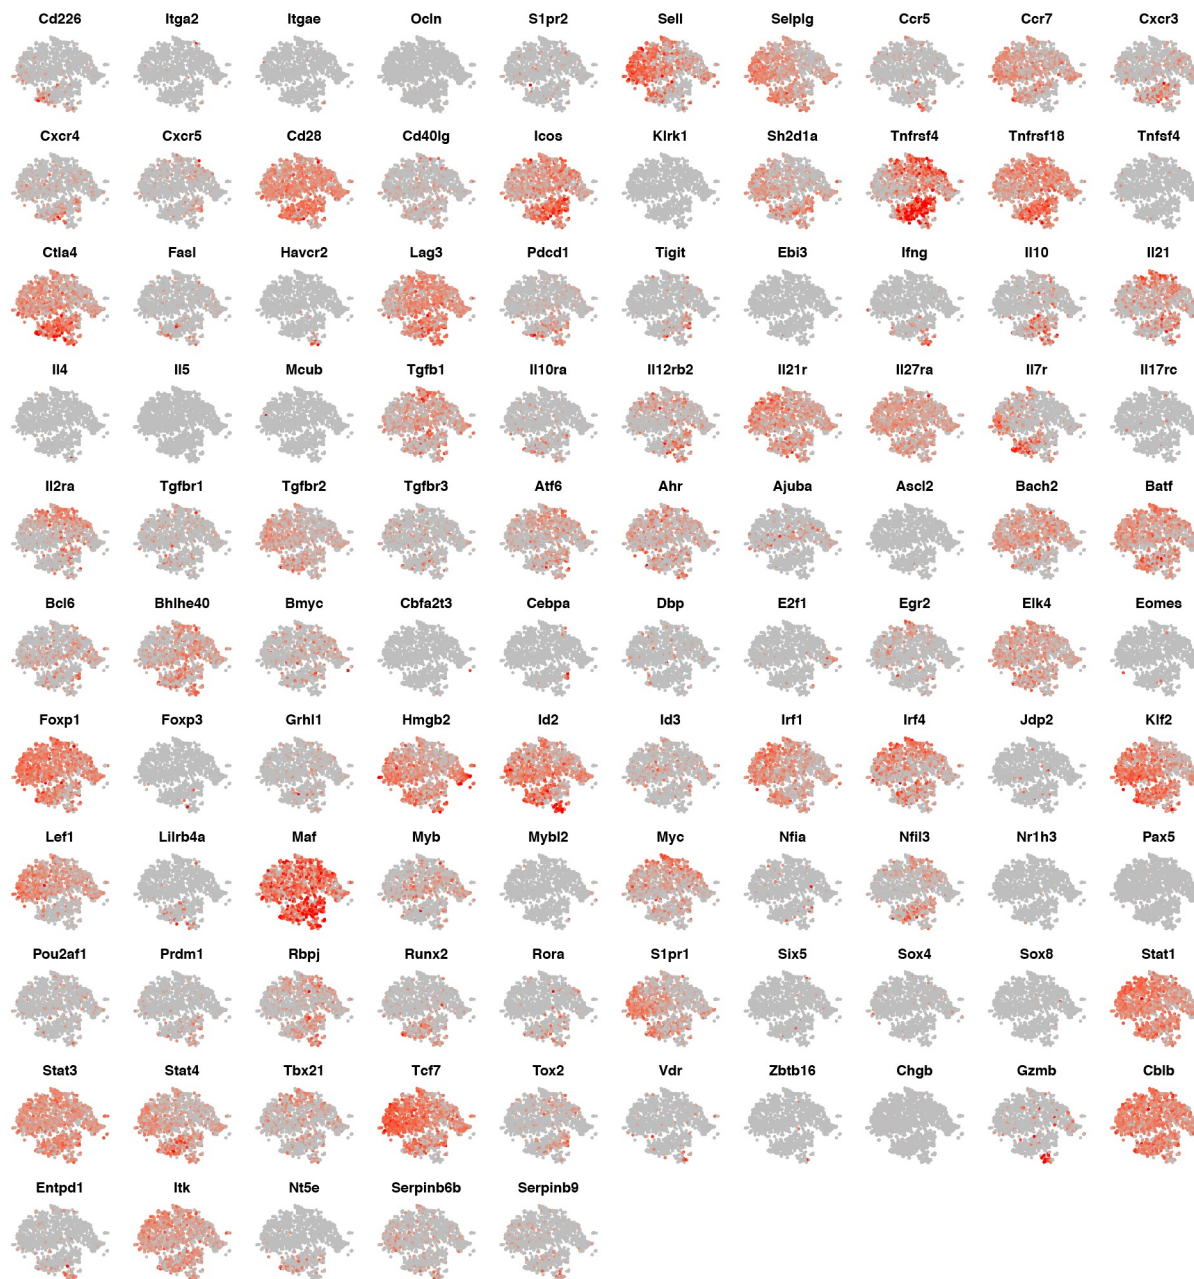

**Supplementary Figure 14. Expression of 106 TR1/TFH/Treg-relevant genes in eGFP (IL-10)+ CD4+ T-cells from anti-CD3 mAb-treated NOD.*Il10-eGFP* and NOD.*Il10-eGFP.Cd4-Cre Bcl6<sup>loxP/loxP</sup>* mice.** Figure shows feature plots for the 106 TR1/TFH/Treg genes from **Supplementary Table 1**. Since gene expression in individual cells as detected by scRNAseq is less sensitive than eGFP reporter expression, a significant number of the eGFP+ cells used for scRNAseq express low levels of IL-10 mRNA and are therefore not coloured in red in the feature plots.

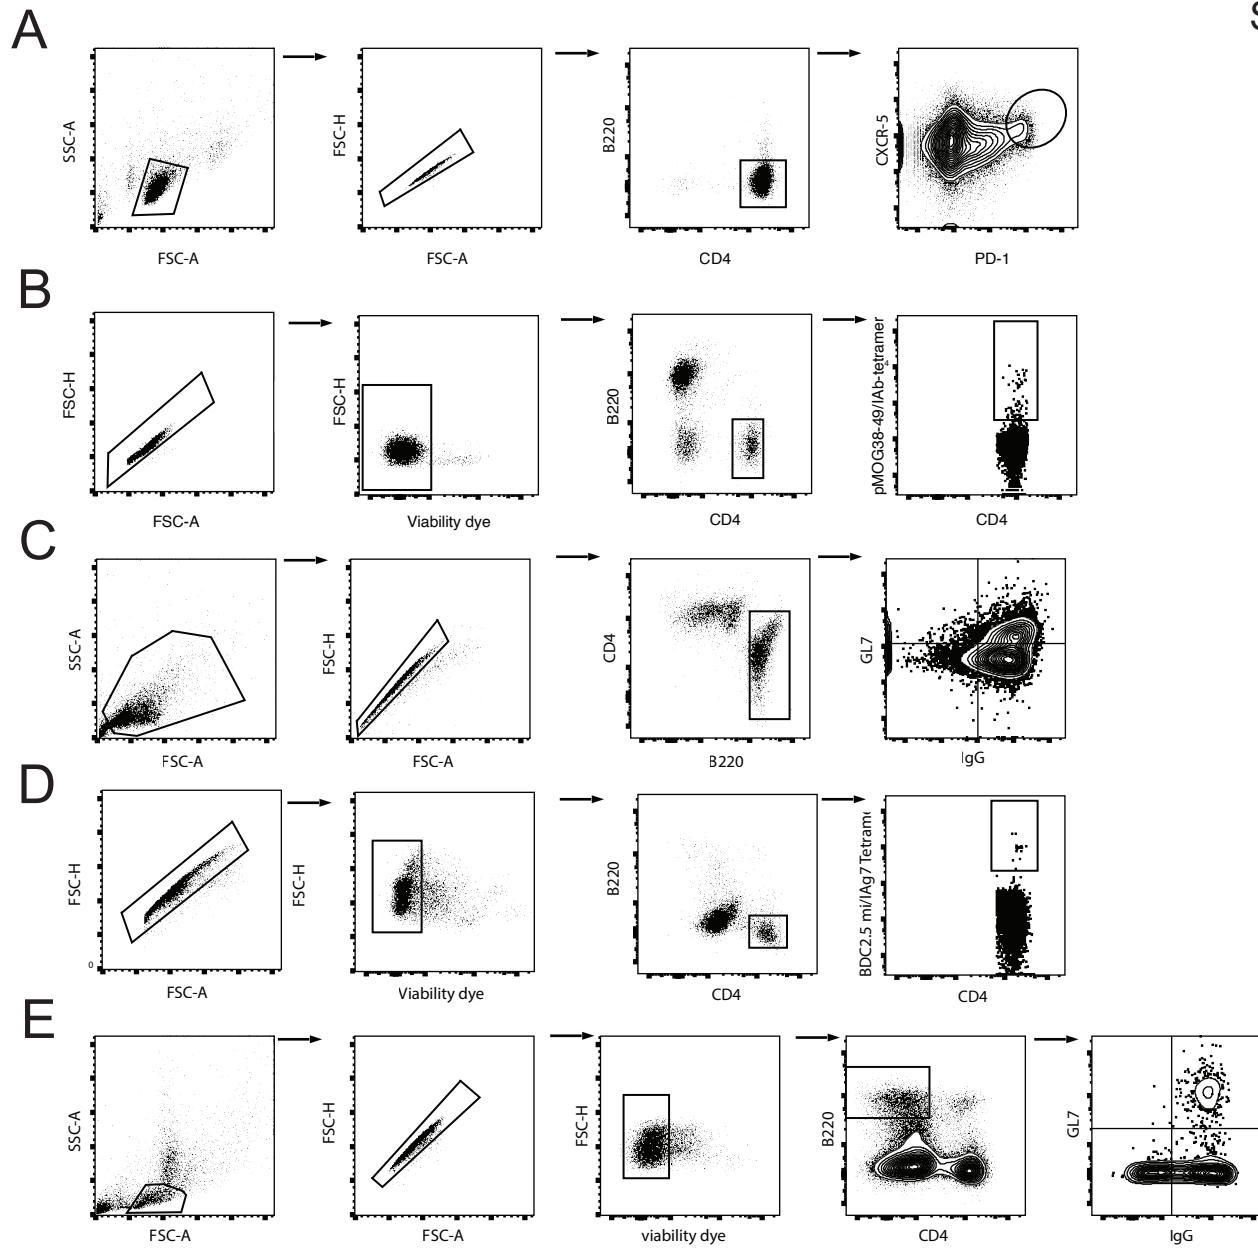

**Supplementary Figure 15. Representative flow cytometry gating profiles for main Figures 9 and 10.** **A**, Gating profile for CXCR5<sup>hi</sup>PD-1<sup>high</sup> CD4<sup>+</sup> T-cells transfused into NOD.*Scid* hosts in **Fig. 9A**. **B**, Gating profile for pMOG<sub>38-49</sub>/I-A<sup>b</sup> Tet<sup>+</sup> cells in mice treated with pMOG<sub>38-49</sub>/I-A<sup>b</sup>-NPs. **C**, Gating profile for B220<sup>+</sup>/GL7<sup>+</sup>/IgG<sup>+</sup> B cells from **Fig. 10C**. **D**, Gating profile for the BDC2.5mi/I-A<sup>g7</sup> Tet<sup>+</sup> cells of the NOD.*Scid* hosts from **Fig. 10E**. **E**, Gating profiles for the GL7<sup>+</sup>sIgG<sup>+</sup>, GL7<sup>-</sup>sIgG<sup>+</sup> and GL7<sup>-</sup>sIgG<sup>-</sup> cells from **Fig. 10F**.



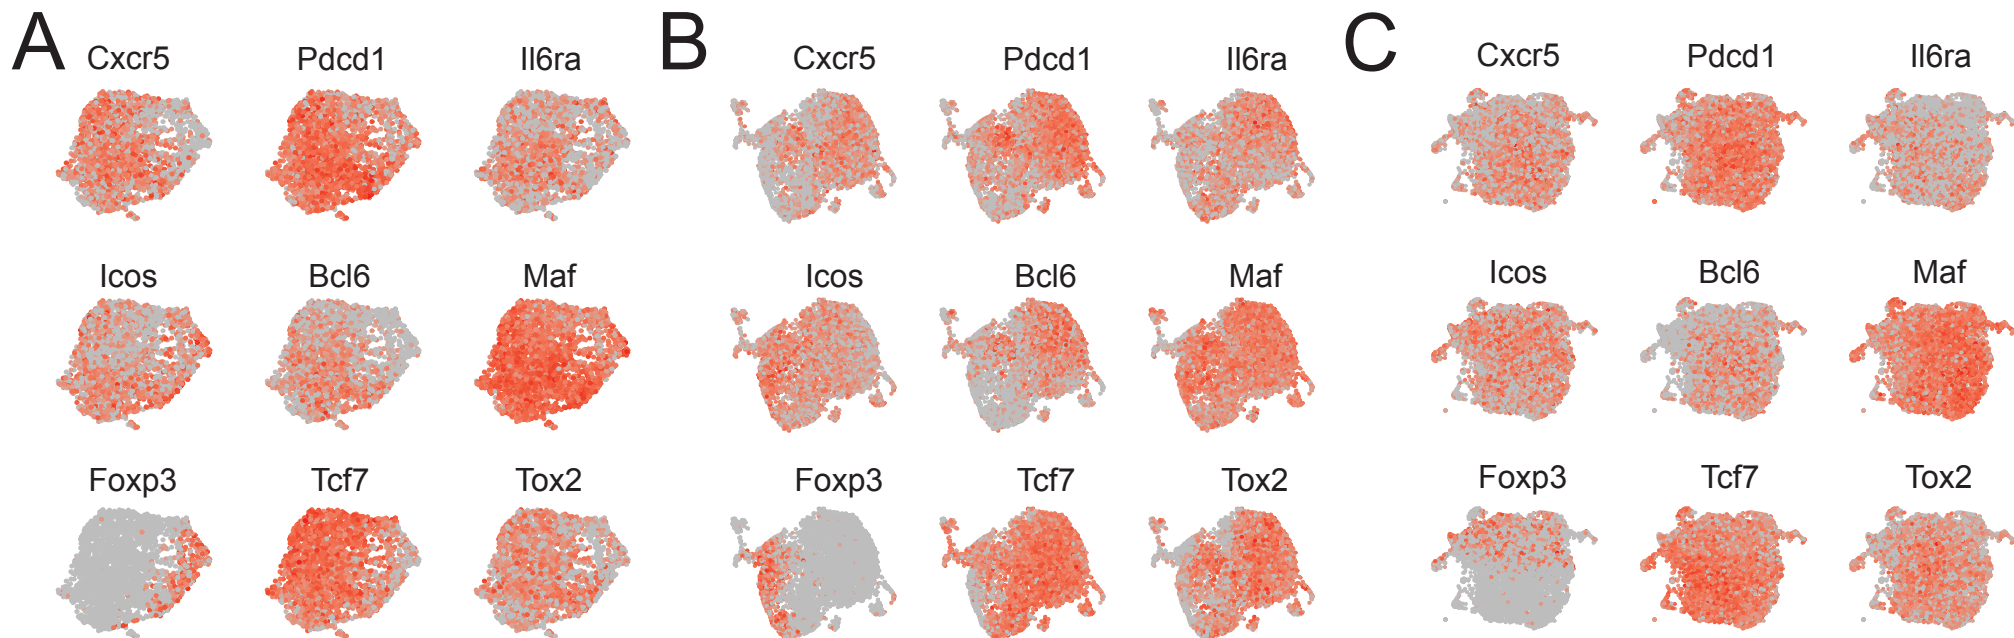

**Supplementary Figure 16. UMAP-based feature plots for representative TFH-associated gene transcripts (and FoxP3) corresponding to the CXCR5<sup>hi</sup>PD-1<sup>high</sup> CD4<sup>+</sup> T-cells from NOD (A), NOD.Cd4-Cre (B) and NOD.Cd4-Cre/Prdm1<sup>loxP/loxP</sup> mice (C) used for the NOD.Scid transfer experiments from Fig. 9.**

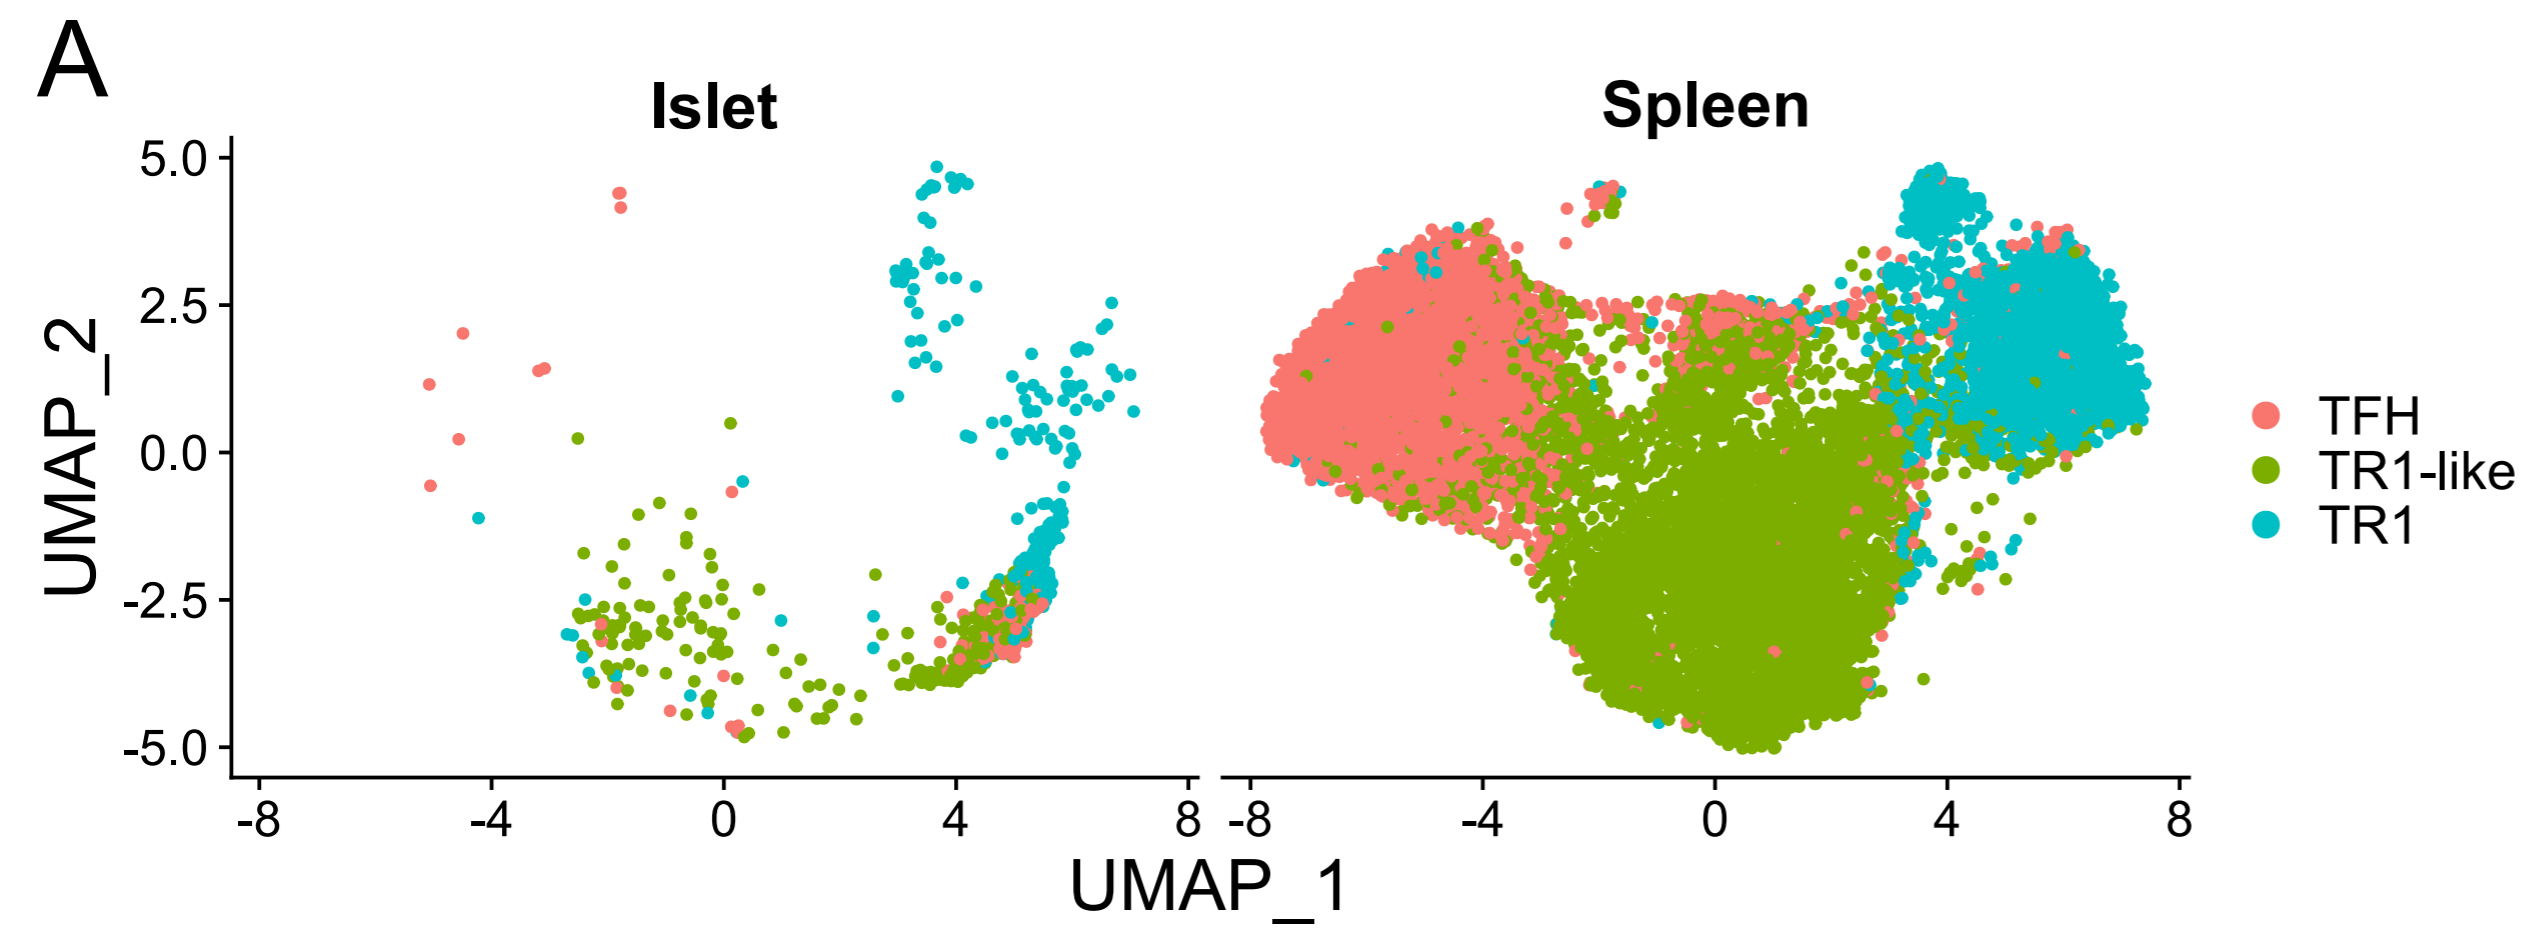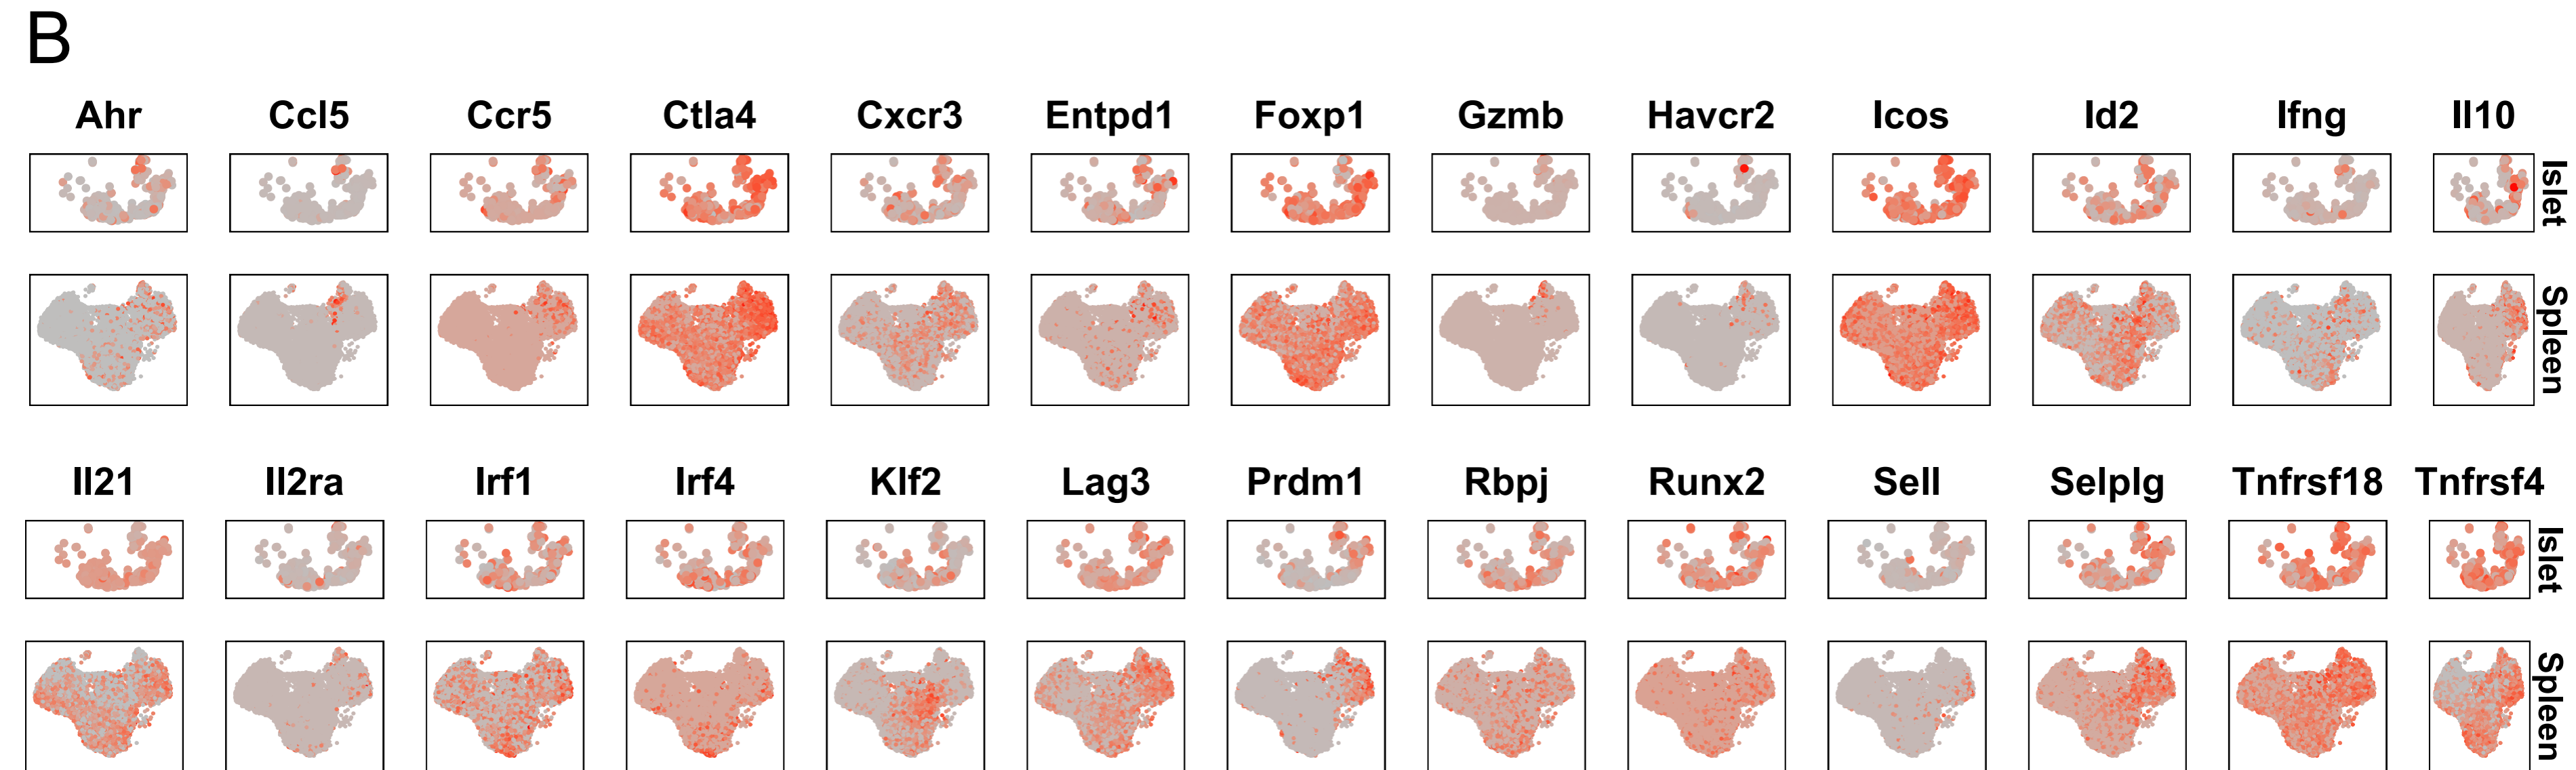

**Supplementary Figure 17. UMAP plots and UMAP-based feature plots for TR1-associated gene transcripts for tetramer<sup>+</sup> CD4<sup>+</sup> cells isolated from islets vs spleen of pMHCII-NP-treated NOD mice. A, UMAP plots. B, Comparison of the expression of genes from Suppl. Table 1 that are differentially upregulated by terminally differentiated TR1 cells vs. TR1-like and/or TFH cells (from Fig. 6C), by the tetramer<sup>+</sup> cells isolated from islets vs spleen of BDC2.5mi/IA<sup>g7</sup>-NP-treated NOD mice.**
